# Supplementary material for: Demystifying Case Management in Aotearoa New Zealand: A scoping and mapping review
Source: Preprints.org preprint supplement (doi:10.20944/preprints202211.0536.v1), 2022-11-29
Supplement: Supplementary file 1 [file supplementary]

## *References for each case management role*

### **1. Whānau Ora Navigators**

Baker, M.; Pipi, K.; Cassidy, T. Kaupapa Māori Action Research in a Whānau Ora Collective: An Exemplar of Māori Evaluative Practice and the Findings. *EM* **2015**, 113–136, doi:[10.18296/em.0006](https://doi.org/10.18296/em.0006).

Boulton, A. Whānau Ora: A Culturally-Informed, Social Policy Innovation. **2019**, 27.

Maniapoto, T.; Gribben, B. Establishing a Maori Case Management Clinic. **2003**, *116*, 9.

Productivity Commission *Appendix C Case Study: Whanau Ora*; NZ Productivity Commission, 2015;

Rissetto, C.R.P.P. Whānau Ora Navigators: Valuing Indigenous Knowledge to Promote Culturally Safe Responsive Practice That Enhances the Health and Well-Being of Whānau, Hapū and Iwi. Master of Social Work, Massey University: Manawatu, 2021.

Savage, C.; Katoa, W.D.; Proctor, T.Y.; Leonard, J.; Goldsmith, L.; Fraser, W. *Whānau Ora Navigators Initial Research for Te Pūtahitanga o Te Waipounamu*; Ihi Research, 2017; p. 44;.

Smith, V.; Moore, C.; Cumming, J.; Boulton, A. Chapter 21. Whanau Ora: An Indigenous Policy Success Story. In *Successful Public Policy: Lessons from Australia and New Zealand*; Luetjens, J., Mintrom, M., 't Hart, P., Eds.; ANU Press: Acton ACT, Australia, 2019; pp. 505–529.

Te Pou Matakana *Kaiarahi Outcomes Report 2016/2017*; Te Pou Matakana Commissioning Agency, 2018;

Te Pou Matakana Commissioning Agency *Te Pou Matakana Outcomes Roadmap*; Te Pou Matakana Commissioning Agency, 2016;

Te Puni Kōkiri Whānau Ora Review. **2018**, 140.

WOCA- Whanau Ora Commissioning Agency *Whanau Ora Commissioning Agency Annual Report 2019-2020*; Whanau Ora Commissioning Agency: Henderson, Auckland, 2020;

### **2. Kai Manaaki (KM)**

Harwood, M.; Tane, T.; Broome, L.; Carswell, P.; Selak, V.; Reid, J.; Light, P.; Stewart, T. Mana Tū: A Whānau Ora Approach to Type 2 Diabetes. *New Zealand Medical Journal* **2018**, *131*, 76–83.

Mullane, T.; Harwood, M.; Warbrick, I.; Tane, T.; Anderson, A. Understanding the Workforce That Supports Māori and Pacific Peoples with Type 2 Diabetes to Achieve Better Health Outcomes. *BMC Health Serv Res* **2022**, *22*, 672, doi:[10.1186/s12913-022-08057-4](https://doi.org/10.1186/s12913-022-08057-4).

National Hauora Coalition *National Hauora Coalition Annual Report 2018*; National Hauora Coalition: Auckland, NZ, 2018;

National Hauora Coalition *National Hauora Coalition Annual Report 2021*; National Hauora Coalition: Auckland, NZ, 2021;

Selak, V.; Stewart, T.; Jiang, Y.; Reid, J.; Tane, T.; Carswell, P.; Harwood, M. Indigenous Health Worker Support for Patients with Poorly Controlled Type 2 Diabetes: Study Protocol for a Cluster Randomised Controlled Trial of the Mana Tū Programme. *BMJ Open* **2018**, *8*, e019572, doi:[10.1136/bmjopen-2017-019572](https://doi.org/10.1136/bmjopen-2017-019572).

Tane, T.; Selak, V.; Hawkins, K.; Lata, V.; Murray, J.; Nicholls, D.; Peihopa, A.; Rice, N.; Harwood, M. Māori and Pacific Peoples' Experiences of a Māori Led Diabetes Programme. *New Zealand Medical Journal* **2021**, *134*, 79–89.

### **3. Maori Cancer Coordinator**

Koia, M. He Pito Ora : Exploring the Role of Māori Cancer Navigators. PhD, Massey University: Wellington, New Zealand, 2019.

Ministry of Health *New Zealand Cancer Action Plan 2019-2029*; Ministry of Health: Wellington, 2020;

Slater, T.M. The Role and Potential of Community Based Cancer Care for Maori in Aotearoa/New Zealand. PhD, Massey University: Wellington, 2016.

Tanuvasa, A.F.; Neale, J. Evaluation of Pacific Cancer Care Navigation Patient Facilitation and Support Service. *Evaluation Journal of Australasia* **2015**, *15*, 30–36.

### **4. Pacific Navigator**

Gray, B.; Stubbe, M.; Hilder, J. *Integrating Health Navigation and Interpreting Services for Patients with Limited English Proficiency*; Department of Primary Health Care & General Practice, University of Otago Wellington (ARCH Group): Wellington, 2017;

Tanuvasa, A.F.; Neale, J. Evaluation of Pacific Cancer Care Navigation Patient Facilitation and Support Service. *Evaluation Journal of Australasia* **2015**, *15*, 30–36.

### **5. Partnership Community Worker**

McCreanor, M.; van Venrooy, M.; Bidwell, S. Collaborating to Improve Equity for the Missing and the Missing out: PCW Partnership Community Worker Service. Presented at the Long Term Conditions Forum, 2020.

Pegasus Health PCW: Partnership Community Worker Success Stories 2022.

Penfold, C. Is the Canterbury Partnership Community Health Worker Project Fulfilling Its Original Intention? Masters of Health Science, University of Canterbury, 2015.

Wilkinson, A.; Atlas, J.; Nelson, K.; Mulligan, H. Client Perceptions of Engaging with a Health and Social Care Navigation Service: A Qualitative Study. *Chronic Illness* **2022**, *18*, 169–180, doi:[10.1177/1742395320937046](https://doi.org/10.1177/1742395320937046).

### **Other Health Navigator**

Doolan-Noble, F.; Smith, D.; Gauld, R.; Waters, D.L.; Cooke, A.; Reriti, H. Evolution of a Health Navigator Model of Care within a Primary Care Setting: A Case Study. *Aust. Health Review* **2013**, *37*, 523, doi:[10.1071/AH12038](https://doi.org/10.1071/AH12038).

## **6. Case Manager (Private Insurance)**

Currie, V. *Managed Care Education Availability, Suitability and Potential of Courses and Qualifications in Regards to Coordinated Care Workforce Skills: A Review for Health Workforce New Zealand*; p. 90;.

## **7 & 8 Accident Compensation Corporation (ACC)- Recovery Partner & Recovery Coordinator**

Accident Compensation Corporation (ACC) *Next Generation Case Management Post Implementation Review: Internal Audit*; ACC, 2022;

Collinson, C.; Flett, R.; Handy, J.; Brook, J.; Alpass, F. Job Satisfaction in Rehabilitation Case Managers: The Role of Organisational Commitment and Climate, Occupational Self Efficacy, and Perceived Competencies. *The Australian Journal of Rehabilitation Counselling* **2000**, *6*, 67–77, doi:[10.1017/S1323892200000909](https://doi.org/10.1017/S1323892200000909).

Currie, V. *Managed Care Education Availability, Suitability and Potential of Courses and Qualifications in Regards to Coordinated Care Workforce Skills: A Review for Health Workforce New Zealand*; p. 90;.

Flett, R.; Collinson, C.; Handy, J.; Alpass, F. Skill Development and Problems in the Achievement of Transfer of Training Effects: Some New Zealand Rehabilitation Case Manager Data. *The Australian Journal of Rehabilitation Counselling* **2002**, *8*, 127–132, doi:[10.1017/S1323892200000594](https://doi.org/10.1017/S1323892200000594).

## **9. Practice Nurse Case Managers.**

Aguirre-Duarte, N.; Ovreteit, J.; Kenealy, T. Evaluating Diabetes Care Quality Improvement Strategies Used by Clinical Teams in Five Primary Care Practices in New Zealand. **2021**, *134*, 89–98.

Carswell, P. Te Whiringa Ora: Person-Centred and Integrated Care in the Eastern Bay of Plenty, New Zealand. *Int J Integr Care* **2015**, *15*, doi:[10.5334/ijic.2242](https://doi.org/10.5334/ijic.2242).

## **Behavioural Support: Health Improvement Practitioner HIP & Health Coach**

Appleton-Dyer, S.; Andrews, S. *Fit for the Future: An Evaluation Overview for the Enhanced Integrated Practice Teams and Our Health in Mind Strategy ( Business Case One)*; Ministry of Health, 2018; p. 7;.

Ministry of Health Health Coaches: Practice Profile 2020.

Ministry of Health Integrated Primary Mental Health and Addiction Services : Implementation Toolkit 2020.

Reiter, J.T.; Dobbmeyer, A.C.; Hunter, C.L. The Primary Care Behavioral Health (PCBH) Model: An Overview and Operational Definition. *J Clin Psychol Med Settings* **2018**, *25*, 109–126, doi:[10.1007/s10880-017-9531-x](https://doi.org/10.1007/s10880-017-9531-x).

## **Needs Assessment Service Coordinator NASC**

Productivity Commission *Appendix E Case Study Home Based Support for Older People*; More effective social services; NZ Productivity Commission, 2015;

## **Local Area Coordinator**

Productivity Commission *Appendix D Case Study Services for People with Disabilities; More effective social services*; NZ Productivity Commission, 2015;

Roorda, M. *Evaluation of Local Area Coordination*; p. 44;

New Model People Stories Available online: <https://www.health.govt.nz/your-health/services-and-support/disability-services/other-peoples-stories/new-model-people-stories> (accessed on 3 September 2022).

## **Kaituhuno (Connector)**

EGL National Leadership Group EGL National Leadership Group Guidance on the Kaituhono/Connector Role 2022.

Lovelock, K. *Implementation Evaluation of Mana Whaikaha System Transformation*; Ministry of Health, 2020;

## **Care Manager Older Adults**

Breton, M.; Gray, C.S.; Sheridan, N.; Shaw, J.; Parsons, J.; Wankah, P.; Kenealy, T.; Baker, R.; Belzile, L.; Couturier, Y.; et al. Implementing Community Based Primary Healthcare for Older Adults with Complex Needs in Quebec, Ontario and New-Zealand: Describing Nine Cases. *International Journal of Integrated Care* **2017**, *17*, 12, doi:[10.5334/ijic.2506](https://doi.org/10.5334/ijic.2506).

Parsons, J.G.M.; Sheridan, N.; Rouse, P.; Robinson, E.; Connolly, M. A Randomized Controlled Trial to Determine the Effect of a Model of Restorative Home Care on Physical Function and Social Support Among Older People. *Archives of Physical Medicine and Rehabilitation* **2013**, *94*, 1015–1022, doi:[10.1016/j.apmr.2013.02.003](https://doi.org/10.1016/j.apmr.2013.02.003).

Parsons, M.; Senior, H.E.J.; Kerse, N.; Chen, M. -h.; Jacobs, S.; Vanderhoorn, S.; Brown, P.M.; Anderson, C. The Assessment of Services Promoting Independence and Recovery in Elders Trial (ASPIRE): A Pre-Planned Meta-Analysis of Three Independent Randomised Controlled Trial Evaluations of Ageing in Place Initiatives in New Zealand. *Age and Ageing* **2012**, *41*, 722–728, doi:[10.1093/ageing/afs113](https://doi.org/10.1093/ageing/afs113).

Parsons, M.; Rouse, P.; Sajtos, L.; Harrison, J.; Parsons, J.; Gestro, L. Developing and Utilising a New Funding Model for Home-Care Services in New Zealand. *Health Soc Care Community* **2018**, *26*, 345–355, doi:[10.1111/hsc.12525](https://doi.org/10.1111/hsc.12525).

Parsons, M.; Senior, H.; Kerse, N.; Chen, M.; Jacobs, S.; Vanderhoorn, S.; Anderson, C. Should Care Managers for Older Adults Be Located in Primary Care? A Randomized Controlled Trial. *J Am Geriatr Soc* **2012**, *60*, 86–92, doi:[10.1111/j.1532-5415.2011.03763.x](https://doi.org/10.1111/j.1532-5415.2011.03763.x).

Parsons, M.; Senior, H.; Kerse, N.; Chen, M.; Jacobs, S.; Anderson, C. Randomised Trial of Restorative Home Care for Frail Older People in New Zealand. *Nursing Older People* **2017**, *29*, 27–33, doi:[10.7748/nop.2017.e897](https://doi.org/10.7748/nop.2017.e897).

Williams, L.A.; Moeke-Maxwell, T.; Wiles, J.; Black, S.; Trussardi, G.; Kerse, N.; Gott, M. How Family Caregivers Help Older Relatives Navigate Statutory Services at the End of Life: A Descriptive Qualitative Study. *Palliat Med* **2018**, *32*, 1124–1132, doi:[10.1177/0269216318765853](https://doi.org/10.1177/0269216318765853).

Wodchis, W.P.; Dixon, A.; Anderson, G.M.; Goodwin, N. Integrating Care for Older People with Complex Needs: Key Insights and Lessons from a Seven-Country Cross-Case Analysis. *Int J Integr Care* **2015**, *15*, doi:[10.5334/ijic.2249](https://doi.org/10.5334/ijic.2249).

### **Cancer Nurse Coordinator**

Blakely, T. Cancer Care Coordinators in Stage III Colon Cancer: A Cost-Utility Analysis. **2015**, 12.

Collinson, L.; Foster, R.H.; Stapleton, M.; Blakely, T. Cancer Care Coordinators: What Are They and What Will They Cost? **2013**, *126*, 13.

Smith, L. *Cancer Nurse Coordinator Initiative Evaluation Final Report*; Ministry of Health, 2016; p. 38;.

### **Case-loading Midwives**

Davis, D. The Politics of Practice. Case-Load Midwifery Practice in New Zealand, Otago Polytechnic, 2006. 1.

Dixon, L.; Guilliland, K.; Pallant, J.; Sidebotham, M.; Fenwick, J.; McAra-Couper, J.; Gilkison, A. The Emotional Wellbeing of New Zealand Midwives: Comparing Responses for Midwives in Caseloading and Shift Work Settings. *nzcomjnl* **2017**, *53*, 5–14, doi:[10.12784/nzcomjnl53.2017.1.5-14](https://doi.org/10.12784/nzcomjnl53.2017.1.5-14).

### **Mental Health Workers**

No articles were found
