# Supplementary material for: Demystifying Case Management in Aotearoa New Zealand: A scoping and mapping review
Source: Preprints.org preprint supplement (doi:10.20944/preprints202211.0536.v1), 2022-11-29
Supplement: Supplementary file 2 [file supplementary]

Archive with 4 entries (4 files):
- S1 Overview of data sources for each role.pdf
- S2 Summary of Jobs Roles & Relationships.pdf
- S3 Eco Map Exemplars.pdf
- S4 References for each case management role.pdf
