# Supplementary material for: Demystifying Case Management in Aotearoa New Zealand: A scoping and mapping review
Source: Preprints.org preprint supplement (doi:10.20944/preprints202211.0536.v1), 2022-11-29
Supplement: Supplementary file 2 [file supplementary › S1 Overview of data sources for each role.pdf]

## SI Summary of data sources for each role

| No.   | Role                                                                                     | Health databases |         |        | Grey literature        |            |                            |                                          | Interviews |        |
|-------|------------------------------------------------------------------------------------------|------------------|---------|--------|------------------------|------------|----------------------------|------------------------------------------|------------|--------|
|       |                                                                                          | Article          | Chapter | Theses | Reports<br>Evaluations | Job Advert | Māori and Pacific websites | Other: Videos, presentation<br>magazines | Interview  | Ecomap |
| 1     | Whānau Ora Navigator                                                                     | ✓✓✓✓✓            | ✓       | ✓      | ✓✓✓✓✓✓✓✓✓✓             | ✓          | ✓✓✓✓✓✓✓✓✓✓✓✓✓✓✓✓           | ✓                                        |            |        |
| 2     | Kai Manaaki (KM)                                                                         | ✓✓✓✓             |         |        | ✓✓                     |            |                            | ✓✓✓                                      |            |        |
| 3     | Māori Cancer Coordinator                                                                 | ✓                |         | ✓✓     |                        |            | ✓✓                         |                                          |            |        |
| 4     | Pacific Navigator                                                                        |                  |         |        | ✓                      |            |                            |                                          | ✓          | ✓      |
| 5     | Partnership Community Worker<br>(PCW)                                                    | ✓                |         | ✓      |                        |            |                            | ✓✓                                       |            |        |
| 6     | Case Manager (Private<br>Insurance)                                                      |                  |         |        | ✓                      | ✓✓✓✓       |                            |                                          | ✓          | ✓      |
| 7     | ACC Recovery Coordinator                                                                 |                  |         |        |                        | ✓          | ✓✓                         |                                          | ✓          | ✓      |
| 8     | ACC Recovery Partner                                                                     | ✓✓               |         |        |                        |            |                            |                                          | ✓          | ✓      |
| 9     | Practice Nurse Case Manager                                                              | ✓✓✓✓✓✓✓✓✓✓       |         |        | ✓✓                     |            | ✓✓                         |                                          | ✓          | ✓      |
| 10,11 | Behavioural Support Practitioner<br>(Health Coach or Health<br>Improvement Practitioner) |                  |         |        | ✓                      | ✓          |                            | ✓✓                                       | ✓          | ✓✓     |
| 12    | Needs Assessment Service<br>Coordinator (NASC)                                           |                  |         |        | ✓                      | ✓✓         | ✓✓✓✓✓                      | ✓                                        | ✓✓         | ✓✓     |
| 13    | Local Area Coordinator (LAC)                                                             |                  |         |        | ✓✓                     |            |                            | ✓                                        |            |        |
| 14    | Kaitūhuno (Connector)                                                                    |                  |         |        | ✓                      |            |                            | ✓✓                                       |            |        |
| 15    | Care Manager Older Adults                                                                | ✓✓✓✓✓            |         |        |                        | ✓✓✓        |                            |                                          | ✓          | ✓      |
| 16    | Cancer Nurse Coordinator                                                                 | ✓✓               |         |        | ✓                      |            |                            |                                          |            |        |
| 17    | Case Loading Midwives                                                                    | ✓                |         | ✓      |                        |            |                            |                                          | ✓✓         |        |
| 18    | Key Worker: Mental Health                                                                | ✓                |         |        |                        | ✓✓✓✓✓      |                            |                                          | ✓✓         |        |
