# Supplementary material for: Demystifying Case Management in Aotearoa New Zealand: A scoping and mapping review
Source: Preprints.org preprint supplement (doi:10.20944/preprints202211.0536.v1), 2022-11-29
Supplement: Supplementary file 2 [file supplementary › S2 Summary of Jobs Roles & Relationships.pdf]

Additional Data: Table 2: Summary of jobs roles relationships

| JOB |                      | ROLE: PURPOSE                                                                                                                                                                                                                                                                                                                                                                                                                                               |                                                                                                                         |                                                                                                                                                                                                                    | ROLE: FUNCTION                                |                                             |                                                                                                                                                                                                                                                                                                                                                                                                                                                                                                                                                                                                                                                                                                                  |                                                                                                                                                                                            | RELATIONSHIPS                                                                                              |                                                                                                                                                            |                                                                                                                                                                                         |
|-----|----------------------|-------------------------------------------------------------------------------------------------------------------------------------------------------------------------------------------------------------------------------------------------------------------------------------------------------------------------------------------------------------------------------------------------------------------------------------------------------------|-------------------------------------------------------------------------------------------------------------------------|--------------------------------------------------------------------------------------------------------------------------------------------------------------------------------------------------------------------|-----------------------------------------------|---------------------------------------------|------------------------------------------------------------------------------------------------------------------------------------------------------------------------------------------------------------------------------------------------------------------------------------------------------------------------------------------------------------------------------------------------------------------------------------------------------------------------------------------------------------------------------------------------------------------------------------------------------------------------------------------------------------------------------------------------------------------|--------------------------------------------------------------------------------------------------------------------------------------------------------------------------------------------|------------------------------------------------------------------------------------------------------------|------------------------------------------------------------------------------------------------------------------------------------------------------------|-----------------------------------------------------------------------------------------------------------------------------------------------------------------------------------------|
|     |                      | Context & Jurisdiction                                                                                                                                                                                                                                                                                                                                                                                                                                      | Client characteristics                                                                                                  | Primary Focus                                                                                                                                                                                                      | Theoretical model                             | Mobility/Intensity                          | Actions ( from taxonomy)                                                                                                                                                                                                                                                                                                                                                                                                                                                                                                                                                                                                                                                                                         | Professional Identify                                                                                                                                                                      | Client and/or Whānau                                                                                       | Inter-disciplinary                                                                                                                                         | Intersectoral                                                                                                                                                                           |
| 1   | Whānau Ora Navigator | Whānau Ora is implemented through Ministry of Health (MOH), Te Puni Kōkiri, Ministry of Social Development (MSD) Three commissioning agencies: Whānau Ora Commissioning Agency (WOCA) for the North Island; Te Pūtahitanga o Te Waipounamu for the South Island and Pasifika Futures for Pacific clients. Each agency pays whānau ora navigators who work in Māori and/or Pacific providers who have clear community links and local areas of focus/concern | Clients and their whānau who are experiencing health and social challenges and lack a sense of control over their lives | Coming alongside whānau to help them get more control over their lives by identifying immediate needs, developing a plan based on whānau aspirations and reducing barriers in access to health and social services | Strengths based & Intensive                   | High mobility and high intensity            | <u>Engagement</u> : ‘Walk alongside’ philosophy; culturally appropriate engagement, holistic wellbeing focus for all family and active building of connections between whānau members and beyond whānau, long term engagement<br><u>Planning</u> : whānau led and whānau driven aspirational goal setting<br><u>Education, training and skills development</u> : training in Māori values using mana enhancing focus; draws on whakapapa to create sense of identify and historical connection between past, present and future, expects reciprocity from whānau in creating opportunities for other members to contribute<br><u>Emotional and motivational support</u> : highly engaged and wrap around support | Cultural knowledge, shared community connections, shared lived experiences and shared values contribute to strong sense of role identity as whānau ora navigators within host organisation | Very engaged and fully committed so often deeply valued by whānau who credit them as ‘lifesaving ‘at times | Shared values with host organisation often mean sense of shared kaupapa (basis for action) but this can be unfamiliar to pakeha from different disciplines | Navigators often need to mentor whānau to be able to connect with intersectoral providers including government organisations so that whānau can engage with them on their own in future |
| 2   | Kai Manaaki (KM)     | Employed by large Māori Primary Health Organisation (PHO) (National                                                                                                                                                                                                                                                                                                                                                                                         | Māori or Pacific clients often living in socially deprived                                                              | To provide wrap around support and walk                                                                                                                                                                            | Combined model with strength based, intensive | High mobile and moderate intensity with 1-3 | <u>Engagement</u> : extended engagement with culturally close person with strong cultural and interpersonal skills,                                                                                                                                                                                                                                                                                                                                                                                                                                                                                                                                                                                              | Similar to above where cultural community and interpersonal knowledge valued                                                                                                               | Walk along side, understanding, whānau centred,                                                            | Work closely with other members GP practice                                                                                                                | Interaction with other sectors (e.g. Work and Income NZ)                                                                                                                                |

<https://www.nzdoctor.co.nz/article/undoctored/living-wage-protect-whanau-ora-navigator-workforce> 100 Whānau Ora Navigator roles in 38 different host agencies in the South Island managed through Te Pūtahitanga o Te Waipounamu ( South Island Whānau Ora Commissioning Agency)

|   |                                |                                                                                            |                                                                                                              |                                                                                                                                  |                                                                              |                                                       |                                                                                                                                                                                                                                                                                                                                                                                                                                                                                                                                                                                                              |                                                                                                                            |                                                                                                                                                         |                                                                                                                                                                                   |                                                                                                                         |
|---|--------------------------------|--------------------------------------------------------------------------------------------|--------------------------------------------------------------------------------------------------------------|----------------------------------------------------------------------------------------------------------------------------------|------------------------------------------------------------------------------|-------------------------------------------------------|--------------------------------------------------------------------------------------------------------------------------------------------------------------------------------------------------------------------------------------------------------------------------------------------------------------------------------------------------------------------------------------------------------------------------------------------------------------------------------------------------------------------------------------------------------------------------------------------------------------|----------------------------------------------------------------------------------------------------------------------------|---------------------------------------------------------------------------------------------------------------------------------------------------------|-----------------------------------------------------------------------------------------------------------------------------------------------------------------------------------|-------------------------------------------------------------------------------------------------------------------------|
|   |                                | Hauora Coalition-NHC):KM positioned in General Practices (GP) connected with this PHO      | areas with poorly controlled diabetes so blood sugar levels that are too high                                | alongside client to help them take control of diabetes and address wider socio-economic determinants that impact on their health | and clinical features                                                        | visits and then regular follow ups; and group support | <u>Holistic Assessment:</u> detailed assessment<br><u>Planning:</u> Decision making support for lifestyle related changes (specific diabetes related-needs and broader goals to support engagement in health and social changes<br><u>Coordination:</u> navigation with health and social services to support health and wellbeing, case consultation with wide GP team.<br><u>Monitoring:</u> review                                                                                                                                                                                                        | but in this programme KM also feel as though they are a key significant contributor in their own right to health care team | supportive, advocate                                                                                                                                    | team, connect with NHC Hub                                                                                                                                                        | that impact on finances or other relevant issues                                                                        |
| 3 | Māori Cancer Coordinator (MCC) | Pilot roles initially funded through midcentral DHB for Māori Organisations-largely rural  | Māori and their whānau who have been diagnosed with cancer and are receiving lengthy and demanding treatment | Work across sectors with clients across continuum to make journey easier for Māori and their whānau                              | Cultural whānau ora model of relational navigation; strength based/intensive | Very mobile, very intensive                           | <u>Engagement:</u> culturally responsive and MCC may have lived experience<br><u>Assessments:</u> identification of needs<br><u>Planning:</u> facilitation of client and whānau planning and long term supports<br><u>Emotional and motivational support:</u> very significant<br><u>Education:</u> health literacy building, <u>Coordination:</u> navigating through system<br><u>Facilitation:</u> may also provide practical support like driving<br><u>Other:</u> NB: MCC are also requested by hospital to provide cultural duties above and beyond like karakia, and managing the body of the deceased | Likely background in whānau ora navigation, community health worker and /or lived experience                               | Very high level engagement, become like family and this continues after the client has passed, trusted, share their own resources (including financial) | Mixed relationship at times, somewhat misunderstood but also called upon provide cultural services in hospitals; very complex coordination so demanding role with cancer services | Likely draw of full range of personal community connections as underfunding means limited and non-sustainable resources |
| 4 | Pacific Navigator              | Usually urban and based in either Auckland or Wellington, often employed by Pacific health | Pacific immigrants often from Samoa or Tonga, limited health literacy                                        | Enabling clients to understand the system, the language                                                                          | Cultural specific approach:                                                  | Highly mobile and possibly highly intensive           | <u>Engagement:</u> through culturally appropriate communication<br><u>Holistic assessment</u> evaluation of needs                                                                                                                                                                                                                                                                                                                                                                                                                                                                                            | Member cultural community seems most significant identity; many don't have a clinical                                      | Holistic wrap around service that considers al dimensions of health; whānau-centred                                                                     | Shared values within host organisation can support professional                                                                                                                   | Often have strong intersectoral relationships with government                                                           |

|   |                                    |                                                                                                                                                                                                                                                              |                                                                                                                                                                            |                                                                                                                                       |                                                          |                                           |                                                                                                                                                                                                                                                                                                                                                                                                                                             |                                                                                                                                         |                                                                                                                                                                                                       |                                                                                                                                       |                                                                                                                                     |
|---|------------------------------------|--------------------------------------------------------------------------------------------------------------------------------------------------------------------------------------------------------------------------------------------------------------|----------------------------------------------------------------------------------------------------------------------------------------------------------------------------|---------------------------------------------------------------------------------------------------------------------------------------|----------------------------------------------------------|-------------------------------------------|---------------------------------------------------------------------------------------------------------------------------------------------------------------------------------------------------------------------------------------------------------------------------------------------------------------------------------------------------------------------------------------------------------------------------------------------|-----------------------------------------------------------------------------------------------------------------------------------------|-------------------------------------------------------------------------------------------------------------------------------------------------------------------------------------------------------|---------------------------------------------------------------------------------------------------------------------------------------|-------------------------------------------------------------------------------------------------------------------------------------|
|   |                                    | provider with strong community links, may receive funding through Whānau Ora commissioning (Pasifika Futures) or other streams                                                                                                                               | and access barriers to health and social care services                                                                                                                     | those who work in it, how to access the system and advocating and building health literacy. Key purpose is to remove barriers to care |                                                          |                                           | <u>Navigating</u> : linking with networks (organisations, individuals, professionals)<br><u>Facilitating</u> : may involve accompanying client to appointments interpreting, translating and explaining medical procedures and organisation appointments                                                                                                                                                                                    | background but may have worked as a community health worker but are valued for their cultural health language and community connections |                                                                                                                                                                                                       | integration within organisation                                                                                                       | and non-government organisations including food banks, schools and housing related non-profit groups                                |
| 5 | Partnership Community Worker (PCW) | PCW is a unique role in Christchurch developed by large PHO (Pegasus) to meet needs 'underserved' populations                                                                                                                                                | Clients are those who have difficulty accessing health care including Māori, Pacific, immigrant groups but also those with homelessness and range health and social issues | To provide a bridge and practical support for people having difficulty accessing the services by working to reduce barriers to access | Intensive                                                | Highly mobile and can be highly intensive | <u>Engagement</u> : listening ear<br><u>Emotional and motivational support</u> : feeling understood<br><u>Holistic assessment</u> : identification of barriers<br><u>Planning</u> : some collaborative planning<br><u>Coordination</u> : advocating and facilitating by providing assistance via transport, advising on eligibility, navigating by linking services                                                                         | Navigation role to reduce barriers, and build capability: links to community valued                                                     | Described as warm listening ear, who acts as a bridge between the client and services; PCW intentionally build positive relationships; providing support for transport significant part of their role | PCW is located within different host organisation historically has met with practice nurses to enhance access to primary health care  | Due to co-location within host organisation has strong links with this organisation and community organisations related to the host |
| 6 | Case Manager (Private Insurance)   | Clients hold private health insurance usually regarding income protection- in case of disability clients receive recompense as stipulated by their contract; case manager aims to minimise length on time receiving pay-outs to support return to employment | Clients have some form of health problem limiting them from working so are making a claim (often after being declined from ACC)                                            | Primary focus is on determining eligibility and calculations for minimal risk to private company from lengthy time of pay-outs        | Brokerage model with focus on reducing costs to company- | Low mobile; low intensity                 | <u>Engagement</u> : acceptance of referral if deemed eligible so may need clarify if anything was not disclosed and needs to be investigated<br><u>Assessment</u> : usually refer to specialist to assess needs such as neuropsychologists, GP, surgeons, employers<br><u>Planning</u> : identify likely length of time of work off work<br><u>Coordination</u> : navigating and linking into referrals,<br><u>Monitoring</u> : progress on | Few have rehabilitation focus so no other identity other than case manager                                                              | Collaborative relationship is expected; but presumably difficult to have therapeutic relationship                                                                                                     | Receiving reports and advice from range of people – both internal including medical specialist and providers and external specialists | Work with IRD and employers regarding return to work                                                                                |

|   |                          |                                                                                                                                                                                                |                                                                                                                                                                             |                                                                                                                                                                                                                               |                                                                                                                                                                                                             |                                                                                                                                                                      |                                                                                                                                                                                                                                                                                                                                                                                                                                                                                                                                                               |                                                                                                                                                   |                                                                                                                         |                                                                                                          |                                                                                                       |
|---|--------------------------|------------------------------------------------------------------------------------------------------------------------------------------------------------------------------------------------|-----------------------------------------------------------------------------------------------------------------------------------------------------------------------------|-------------------------------------------------------------------------------------------------------------------------------------------------------------------------------------------------------------------------------|-------------------------------------------------------------------------------------------------------------------------------------------------------------------------------------------------------------|----------------------------------------------------------------------------------------------------------------------------------------------------------------------|---------------------------------------------------------------------------------------------------------------------------------------------------------------------------------------------------------------------------------------------------------------------------------------------------------------------------------------------------------------------------------------------------------------------------------------------------------------------------------------------------------------------------------------------------------------|---------------------------------------------------------------------------------------------------------------------------------------------------|-------------------------------------------------------------------------------------------------------------------------|----------------------------------------------------------------------------------------------------------|-------------------------------------------------------------------------------------------------------|
|   |                          |                                                                                                                                                                                                |                                                                                                                                                                             |                                                                                                                                                                                                                               |                                                                                                                                                                                                             |                                                                                                                                                                      | readiness to return to work                                                                                                                                                                                                                                                                                                                                                                                                                                                                                                                                   |                                                                                                                                                   |                                                                                                                         |                                                                                                          |                                                                                                       |
| 7 | ACC Recovery Coordinator | Government provider of insurance, support for clients recovering from accidents; ACC seeks to fund services to help return to work and independent functioning; closely linked ACC legislation | Clients with a wide range of ages who have had an injury from an accident with primarily physical symptoms; some are recent injuries and others are decades old             | To support clients in their recovery journey and fund services that support rehabilitation needed to return to independence or work                                                                                           | Primarily brokerage model (focuses on needs evaluation, referral to services, and oversight of care coordination) but can involve some clinical features that tailor services and provide therapeutic input | Low mobile; usually over phone or text; low-medium intensity                                                                                                         | <p><u>Engagement</u>: seeks establish partnerships with lots of careful listening.</p> <p><u>Holistic Assessment</u>: gathers notes, background information, refers to health care professionals (HCP) for other assessments</p> <p><u>Planning</u>: supports client planning and works with HCP</p> <p><u>Coordination</u>: links with providers who are delivering.</p> <p><u>Education</u>: Does not provide education or skills development but refers to specialist providers to deliver care.</p>                                                       | No clear professional identity; new title and role after ACC restructure. significant amount of inhouse training and regular supervision provided | Organisation promotes people before process but tension at times as need to check people not taking advantage of system | Has large network of support within ACC to guide practice, Works with providers e.g. Physio or OT and GP | Suppliers of equipment                                                                                |
| 8 | ACC Recovery Partner     | Government provider of insurance; ACC aims to support clients in recovery and fund services to help return to work and independent functioning; closely linked ACC legislation                 | Clients with a wide range of ages who have had an injury from an accident that has led to moderate to severe injuries with high and complex needs and multiple stakeholders | For these clients the primary focus is on ensuring they have a good quality of life, supporting access to places they need to go, appropriate equipment for needs and support to be meaningfully engaged with their community | Clinical                                                                                                                                                                                                    | Varies depending on stage; can be intensive with 3-4x week during discharge planning stage from facility and less frequent once systems set up unless issues develop | <p><u>Engagement</u>: acceptance of referral is determined centrally, engagement initially is with next of kin, and health care team during rehabilitation stay and client as they become more able to participate.</p> <p><u>Assessment</u>: no formal assessment but listening to their point of view.; referral to HCP and specialists for assessment, gather information to pass onto assessors; outcome assessment by HCP</p> <p><u>Planning</u>: discuss with client different steps, likely support needs, managing expectations of return to home</p> | Previously known as serious injury case managers and still refer to this title often                                                              | Key support role for next of kin especially when having difficulties with support carers                                | Significant inter-disciplinary relationships across multiple organisation                                | Work closely with large range of sectors including DHB, rehabilitation schooling, and justice systems |

|          |                                                                                                          |                                                                                                                                                                                                  |                                                                                                                                           |                                                                                                                                       |                                                                                               |                                                                                                                      |                                                                                                                                                                                                                                                                                                                                                                                                                                                                                 |                                                                                                                                                                               |                                                                                                                                                          |                                                                                                                                                                                                                |                                                                                                  |
|----------|----------------------------------------------------------------------------------------------------------|--------------------------------------------------------------------------------------------------------------------------------------------------------------------------------------------------|-------------------------------------------------------------------------------------------------------------------------------------------|---------------------------------------------------------------------------------------------------------------------------------------|-----------------------------------------------------------------------------------------------|----------------------------------------------------------------------------------------------------------------------|---------------------------------------------------------------------------------------------------------------------------------------------------------------------------------------------------------------------------------------------------------------------------------------------------------------------------------------------------------------------------------------------------------------------------------------------------------------------------------|-------------------------------------------------------------------------------------------------------------------------------------------------------------------------------|----------------------------------------------------------------------------------------------------------------------------------------------------------|----------------------------------------------------------------------------------------------------------------------------------------------------------------------------------------------------------------|--------------------------------------------------------------------------------------------------|
|          |                                                                                                          |                                                                                                                                                                                                  |                                                                                                                                           |                                                                                                                                       |                                                                                               |                                                                                                                      | <u>Emotional and motivational support:</u><br>often provides place to support processing anger and loss and reframing<br><u>Advising:</u> ways to access funding<br><u>Coordination:</u> Managing assessments, case consultation with schools<br><u>Review</u> plan and feedback and monitoring. Not advocacy                                                                                                                                                                   |                                                                                                                                                                               |                                                                                                                                                          |                                                                                                                                                                                                                |                                                                                                  |
| 9        | Practice Nurse Case Manager                                                                              | Primary Health Care role, usually working in GP practices who may be part of a Primary Health Organisation (PHO) who are using Care Plus funding to meet needs clients with long-term conditions | People with multiple long-term conditions (complex health needs) enrolled in GP practice/PHO and are struggling to manage their condition | Employed in GP practice to provide clinical support for clients with long term conditions that have been selected for case management | Clinical                                                                                      | low mobile and low intensity                                                                                         | <u>Engagement</u> developed through face-to-face conversations or over the phone; <u>Planning:</u> no evidence; <u>Education</u> regarding self-management and training and skills development, <u>Emotional and motivational support-</u> some. <u>Coordination:</u> In practices where funding available then can provide coordination between different health care services, and facilitate lines of communication between client and providers, <u>Monitoring:</u> limited | Nurse who uses case management processes for selected clients                                                                                                                 | Minimal home visits so contact mainly during face to face clinic visits                                                                                  | Connects with members of GP Practice team (GP, Health Coach, HIP, Community Support Worker) and services such as pharmacists and DHB staff – such as gerontologists, mental health teams and other specialists | Links with residential care, Age Concern, Home Support Services, ambulance and transport hospice |
| 10<br>11 | Behavioural Support: Health Improvement Practitioner (HIP) & Health Coach (also known as Wellbeing Team) | Funded through Mental Health funding but located in GP Practice via PHO contracts. Broad remit to add value to primary health care provision and reduce mental health                            | Clients of GP practice who present with any condition or age as a presenting problem, but who need lifestyle change to improve mental or  | Client centred focus where onus on client to return and implement plan. Both HIP and Health coaches aim to provide                    | Informed by Primary Care Behavioural Health Model (Reiter, 2018) Distinctive features include | Roles (especially HIP) promoted as single session, but clients can see either member of ‘Wellbeing Team’ as often as | <u>Engagement:</u> strong partnership model with client driven and client-initiated focus; engagement between different team members facilitated by warm handover from other members health team. <u>Assessment:</u> Contextual assessment with specific                                                                                                                                                                                                                        | HIP- Registered health care practitioner with experience in mental health (often OT).; Health coaching worked as CSW; may have cultural knowledge and /or community knowledge | Service provided by wellbeing team focuses strongly on client’s needs, goals and readiness to engage. Service structured to ensure service is accessible | Strong team focus between HIP and Health Coach within GP practice. HIP liaises closely with GP. Health Coach                                                                                                   | Health Coach connects with relevant community organisations and cultural or spiritual support    |

|    |                                             |                                                                                                                                                                                                                                                                                                                                          |                                                                                                                                                                   |                                                                                                                   |                                                                                                                       |                                                                                                      |                                                                                                                                                                                                                                                                                                                                                                                                                               |                                                                                |                                                                                                                           |                                                                                         |                                                                                                                                                                     |
|----|---------------------------------------------|------------------------------------------------------------------------------------------------------------------------------------------------------------------------------------------------------------------------------------------------------------------------------------------------------------------------------------------|-------------------------------------------------------------------------------------------------------------------------------------------------------------------|-------------------------------------------------------------------------------------------------------------------|-----------------------------------------------------------------------------------------------------------------------|------------------------------------------------------------------------------------------------------|-------------------------------------------------------------------------------------------------------------------------------------------------------------------------------------------------------------------------------------------------------------------------------------------------------------------------------------------------------------------------------------------------------------------------------|--------------------------------------------------------------------------------|---------------------------------------------------------------------------------------------------------------------------|-----------------------------------------------------------------------------------------|---------------------------------------------------------------------------------------------------------------------------------------------------------------------|
|    |                                             | demands at population level                                                                                                                                                                                                                                                                                                              | physical health. Many clients experience anxiety, or need lifestyle change or have long term conditions or interpersonal communication issues including parenting | behavioural support for health and wellbeing changes                                                              | warm handover, same day service, open door, no follow up, brief session focusing 'what's on top?', no wrong referrals | wish too Health Coach is very mobile in community and clinic; HIP appears primarily based in clinic. | outcome measures (Duke Profile, Hua Oranga)<br><u>Planning</u> : focuses on next steps so immediate<br><u>Education, training and skills</u><br>Focus on literacy and self-management skills (especially health coach)<br><u>Emotional and motivational support</u> : Key role<br><u>Coordination</u> : can provide support for client to navigates health and social services and provide feedback to practice team          |                                                                                | and timely, often same day                                                                                                | works closely with Practice Nurse. HIP may liaise with secondary mental health services |                                                                                                                                                                     |
| 12 | Needs Assessment Service Coordinator (NASC) | Different commissioning models for people who are 65 years or older as funding 'devolved' to DBH who purchase services from NGO providers; For those who are under 65 years old the MOH purchase home based support services directly; Structured role with standardised assessment process (InterRAI) tightly linked to funding options | Older adults or people with disability referred NASC after hospital discharge or self-family-GP referral if unmet needs                                           | Aim support people at home by offering specific DHB funded services to avoid clients requiring institutional care | Brokerage model; needs based focus; goal maximise/enable independence                                                 | Highly mobile but often only one face to face visit, so low intensity                                | <u>Engagement</u> : Yes<br><u>Assessment</u> : facilitated needs assessment using InterRAI; <u>Planning</u> for task-related supports and allocation of resources within fixed budget<br><u>motivational and emotional support</u> significant amount provided<br><u>Education, training, skills development</u> nil<br><u>co-ordination</u> does not include direct delivery but does work with providers to coordinate care | Registered Health Professional usually social worker                           | Individually focused, minimal engagement whānau; therapeutic helping relationships although minimal relational continuity | Strong relationship with Geriatrician, GP's and Practice nurses teams, client lawyers   | Relationships with MSD/Landlords; Residential facilities and day programmes, Home based Care providers, MOH Community Card Providers Spiritual and Cultural support |
| 13 | Local Area Coordinator (LAC)                | This 2011 MOH initiative has been trialled in 4 sites; adapted from similar overseas programmes, an LAC is embedded                                                                                                                                                                                                                      | People with disabilities (often lifelong) who are seeking to become more independent                                                                              | Connecting people with disabilities to community resources that can                                               | Strengths based                                                                                                       | Mobile and varying but could be intense in early stages; visit at home but                           | <u>Engagement</u> is essential and maybe complicated by hearing and other communication impairments<br><u>Assessments</u> : no formal assessments but                                                                                                                                                                                                                                                                         | LAC's credibility seems based on quantity and quality of community connections | Works closely with client and their whānau who may often need to adjust how they                                          | Minimal engagement with HCP and broader focus on informal                               | Connections with wide range of industry, education, and other community-                                                                                            |

|    |                           |                                                                                                                                 |                                                                                                        |                                                                                    |                                                                                                |                                                                                                                  |                                                                                                                                                                                                                                                                                                                                                                                                                                                                                                |                                                 |                                                                                                                   |                                                                                         |                                                                                           |
|----|---------------------------|---------------------------------------------------------------------------------------------------------------------------------|--------------------------------------------------------------------------------------------------------|------------------------------------------------------------------------------------|------------------------------------------------------------------------------------------------|------------------------------------------------------------------------------------------------------------------|------------------------------------------------------------------------------------------------------------------------------------------------------------------------------------------------------------------------------------------------------------------------------------------------------------------------------------------------------------------------------------------------------------------------------------------------------------------------------------------------|-------------------------------------------------|-------------------------------------------------------------------------------------------------------------------|-----------------------------------------------------------------------------------------|-------------------------------------------------------------------------------------------|
|    |                           | in a community, provides a support person and direct and responsive funding people with disability.                             | from their family                                                                                      | help them achieve meaningful goals that enhance societal participation             |                                                                                                | also take the client to community settings                                                                       | discussion-based evaluation of needs, gaps, and strengths<br><u>Planning</u> Collaborative conversations including brainstorming and vision building; identification of small steps; support for relational/communication skills development;<br><u>Emotional and motivational support</u> -significant<br><u>Coordination</u> occasional advising but only minor coordination; some reviewing of goal attainment                                                                              |                                                 | interact with their child                                                                                         | community connections                                                                   | based services;                                                                           |
| 14 | Kaituhuno (Connector)     | Enabling Good Lives (EGL) initiative now under Ministry of Disabled People; 4 pilot programmes – driven by disabled individuals | Often young adults with disabilities seeking more independence and societal participation              | Strengths-based                                                                    | EGL movement which is strengths-based approach and values lived experience; emancipatory focus | Very mobile and intensity varies; encourages self-responsibility of clients to manage care decisions and funding | <u>Engagement</u> : Lived experience considered to facilitate engagement, <u>Assessment</u> : holistic process using self-assessment and EGL principles; <u>Planning</u> with vision building and next steps; <u>Training and skills development</u> : intentional skills development with community resources; <u>Emotional and motivational support</u> : significant emotional support, advising from own experience; <u>minimal coordination</u> (either by client/family or systems team) | Lived experience is prioritised for these roles | An ally without conflicts of interest to avoid interfering with goals /preference of clients                      | Minimal if any relationships to other HCP                                               | Role draws on personal community connections                                              |
| 15 | Care Manager Older Adults | Community Located, DHB funded, managed by NGO usually                                                                           | Community dwelling older adults who are at risk of becoming dependent and requiring institutional care | Maintaining client in their own home and ensuring both client remains safe and has | Clinical model that may have a capability enhancing aspect if applying restorative focus       | Mobile and usually meets own home; low intensity with 1-2 sessions for assessments and then 3-                   | <u>Engagement</u> : high <u>Assessment</u> : may include comprehensive (holistic) assessment<br><u>Planning</u> : goal planning and develop shared care plans<br><u>Coordination</u> : between home-based health care                                                                                                                                                                                                                                                                          | Primary identity often nurse or social worker   | Trusting, supportive relationship with client; some clients may have next of kin who are geographical distant, or | Range of relationships with community services such as GP, pharmacist, NASC colleagues, | Key relationships include Housing NZ; police, welfare, age concern and fire and emergency |

|    |                          |                                                                                                                                                                                                                  |                                                                                                                                      |                                                                                                                                                           |                                                                                                                                        |                                                                                                                                                                                                                   |                                                                                                                                                                                                                                                                                                                                                                                                                                         |                                                                                 |                                                                                                                  |                                                                                                                                                                                                                     |                                                                                                               |
|----|--------------------------|------------------------------------------------------------------------------------------------------------------------------------------------------------------------------------------------------------------|--------------------------------------------------------------------------------------------------------------------------------------|-----------------------------------------------------------------------------------------------------------------------------------------------------------|----------------------------------------------------------------------------------------------------------------------------------------|-------------------------------------------------------------------------------------------------------------------------------------------------------------------------------------------------------------------|-----------------------------------------------------------------------------------------------------------------------------------------------------------------------------------------------------------------------------------------------------------------------------------------------------------------------------------------------------------------------------------------------------------------------------------------|---------------------------------------------------------------------------------|------------------------------------------------------------------------------------------------------------------|---------------------------------------------------------------------------------------------------------------------------------------------------------------------------------------------------------------------|---------------------------------------------------------------------------------------------------------------|
|    |                          |                                                                                                                                                                                                                  |                                                                                                                                      | opportunity to regain functional reserve                                                                                                                  |                                                                                                                                        | 6 monthly reviews                                                                                                                                                                                                 | services and other health and social service providers, engaging with multidisciplinary team<br><u>Monitoring:</u> multiple follow up                                                                                                                                                                                                                                                                                                   |                                                                                 | neighbours who are close. Role may involve protecting caregivers, encouraging shared care planning conversations | and community DHB providers.                                                                                                                                                                                        |                                                                                                               |
| 16 | Cancer Nurse Coordinator | Works in each DBH across tertiary, secondary and primary care to coordinate cancer services                                                                                                                      | Recently diagnosed with cancer, particularly physically and emotionally vulnerable, need to access complex system                    | Provide care coordination, psycho-social support and information support to help navigate all stages care                                                 | Advanced clinical role                                                                                                                 | Appears focused on hospital setting with less engagement with primary care; intensity may depend on regularity of hospital-based treatments                                                                       | <u>Engagement:</u> acceptance referral if meet complexity criteria,<br><u>Assessment:</u> gathering information and listening<br><u>Emotional and motivational support:</u> significant<br><u>Education:</u> significant<br><u>Coordination</u> through navigating, facilitating, advocating, case consultation<br><u>Feedback:</u> to others involved in providing care                                                                | Advanced nurse specialist                                                       | Main point of call for client and whānau                                                                         | Liaises with hospital based providers variety of disciplines; links with primary settings less established                                                                                                          | Minimal                                                                                                       |
| 17 | Case Loading Midwives    | Midwives work in a distinctive context- before, during and after birth. As Lead Maternity Caregivers they have distinct legal requirements for care. An emancipatory philosophy influences their practice in NZ. | Clients who are pregnant choose their own midwife who provides continuity of care for them. ( ¾ NZ women select a midwife for care ) | To ensure birth as 'normal' as possible, optimal clinical outcomes for mum, baby and whānau and work in partnership that also involves advocacy as needed | Clinical/ Intensive/ Strengths-based; strong focus on partnership, and a holistic view of health and wellbeing, and emancipatory ethos | Very mobile and very intensive visiting women in their own homes for specific time frames; for those with complex social issues it can also be particularly intensive if additional assistance is needed/provided | <u>Engagement:</u> High<br><u>Assessment:</u> ongoing assessment of wellbeing of mother and baby<br><u>Emotional and motivational support:</u> High<br><u>Education and training:</u> High including training in breastfeeding or other mothering roles, education about health and wellbeing and<br><u>Coordination:</u> coordinating scans, hospital or other birthing situations, and other health related issues for mother or baby | Strong professional identify as midwife with associated emancipatory philosophy | Partnership and emancipatory approach and include whānau in this                                                 | Needs to work closely with fellow midwives to manage 24 hour care; connects secondary care like scan/blood tests and tertiary care birthing providers such as hospital midwives and obstetricians; birthing suites; | Depending on social situation may feel need to be involved in social organisations if directly affecting care |

|    |                       |                                                                                                                                                                                                                             |                                                                                                                                                                                          |                                                                                                                           |                                                                                         |                                                                                  |                                                                                                                                                                                                                                                                             |                                                                                                                              |                                                                                   |                                                                      |                                                                                                                                             |
|----|-----------------------|-----------------------------------------------------------------------------------------------------------------------------------------------------------------------------------------------------------------------------|------------------------------------------------------------------------------------------------------------------------------------------------------------------------------------------|---------------------------------------------------------------------------------------------------------------------------|-----------------------------------------------------------------------------------------|----------------------------------------------------------------------------------|-----------------------------------------------------------------------------------------------------------------------------------------------------------------------------------------------------------------------------------------------------------------------------|------------------------------------------------------------------------------------------------------------------------------|-----------------------------------------------------------------------------------|----------------------------------------------------------------------|---------------------------------------------------------------------------------------------------------------------------------------------|
| 18 | Mental Health Workers | These workers are highly mobile and intensive often in people homes and community settings; they need to consider range legislation including mental health legislation, court-imposed legality and child protection orders | Clients have a diagnosed mental health condition but likely have physical and addiction issues; seeking make gains in health and wellbeing and reduce dependence on health care services | Supportive and proactive therapeutic relationship providing motivational and emotional support to regain satisfying lives | Strengths based and intensive approaches that may also draw on holistic cultural models | Highly mobile and can be very intensive but tailored to stage of client recovery | Both community support workers (CSW) and registered health professionals are involved with planning and organising care but CSW have a smaller percentage of time and less complex clients to coordinate. Significant amount of emotional and motivational support required | Distinction between regulated and non-regulated; if regulated as OT or SW likely carry dual identity and practice both roles | Client centred and capability enhancing approach; variable engagement with whānau | Works closely with mental health clinicians from DHB, and clients GP | Budgeting, multiple community providers, WINZ, Oranga Tamariki, Police/Family Harm, Suicide pre/post vention ; Cultural court for local iwi |
|----|-----------------------|-----------------------------------------------------------------------------------------------------------------------------------------------------------------------------------------------------------------------------|------------------------------------------------------------------------------------------------------------------------------------------------------------------------------------------|---------------------------------------------------------------------------------------------------------------------------|-----------------------------------------------------------------------------------------|----------------------------------------------------------------------------------|-----------------------------------------------------------------------------------------------------------------------------------------------------------------------------------------------------------------------------------------------------------------------------|------------------------------------------------------------------------------------------------------------------------------|-----------------------------------------------------------------------------------|----------------------------------------------------------------------|---------------------------------------------------------------------------------------------------------------------------------------------|

## HEALTH NAVIGATORS

### Whānau Ora Navigators

1. Baker, M.; Pipi, K.; Cassidy, T. Kaupapa Māori Action Research in a Whānau Ora Collective: An Exemplar of Māori Evaluative Practice and the Findings. *EM* **2015**, 113–136, doi:[10.18296/em.0006](https://doi.org/10.18296/em.0006).
2. Boulton, A. Whānau Ora: A Culturally-Informed, Social Policy Innovation. **2019**, 27.
3. Maniapoto, T.; Gribben, B. Establishing a Maori Case Management Clinic. **2003**, 116, 9.
4. Productivity Commission *Appendix C Case Study: Whanau Ora*; NZ Productivity Commission, 2015;
5. Risetto, C.R.P.P. Whānau Ora Navigators: Valuing Indigenous Knowledge to Promote Culturally Safe Responsive Practice That Enhances the Health and Well-Being of Whānau, Hapū and Iwi. Master of Social Work, Massey University: Manawatu, 2021.
6. Savage, C.; Katoa, W.D.; Proctor, T.Y.; Leonard, J.; Goldsmith, L.; Fraser, W. *Whānau Ora Navigators Initial Research for Te Pūtahitanga o Te Waipounamu*; Ihi Research, 2017; p. 44;.
7. Smith, V.; Moore, C.; Cumming, J.; Boulton, A. Chapter 21. Whanau Ora: An Indigenous Policy Success Story. In *Successful Public Policy: Lessons from Australia and New Zealand*; Luetjens, J., Mintrom, M., 't Hart, P., Eds.; ANU Press: Acton ACT, Australia, 2019; pp. 505–529.

8. Te Pou Matakana *Kaiarahi Outcomes Report 2016/2017*; Te Pou Matakana Commissioning Agency, 2018;
9. Te Pou Matakana Commissioning Agency *Te Pou Matakana Outcomes Roadmap*; Te Pou Matakana Commissioning Agency, 2016;
10. Te Puni Kōkiri Whānau Ora Review. **2018**, 140.
11. WOCA- Whanau Ora Commissioning Agency *Whanau Ora Commissioning Agency Annual Report 2019-2020*; Whanau Ora Commissioning Agency: Henderson, Auckland, 2020;

### **Kai Manaaki (KM)**

1. Harwood, M.; Tane, T.; Broome, L.; Carswell, P.; Selak, V.; Reid, J.; Light, P.; Stewart, T. Mana Tū: A Whānau Ora Approach to Type 2 Diabetes. *New Zealand Medical Journal* **2018**, *131*, 76–83.
2. Mullane, T.; Harwood, M.; Warbrick, I.; Tane, T.; Anderson, A. Understanding the Workforce That Supports Māori and Pacific Peoples with Type 2 Diabetes to Achieve Better Health Outcomes. *BMC Health Serv Res* **2022**, *22*, 672, doi:[10.1186/s12913-022-08057-4](https://doi.org/10.1186/s12913-022-08057-4).
3. National Hauora Coalition *National Hauora Coalition Annual Report 2018*; National Hauora Coalition: Auckland, NZ, 2018;
4. National Hauora Coalition *National Hauora Coalition Annual Report 2021*; National Hauora Coalition: Auckland, NZ, 2021;
5. Selak, V.; Stewart, T.; Jiang, Y.; Reid, J.; Tane, T.; Carswell, P.; Harwood, M. Indigenous Health Worker Support for Patients with Poorly Controlled Type 2 Diabetes: Study Protocol for a Cluster Randomised Controlled Trial of the Mana Tū Programme. *BMJ Open* **2018**, *8*, e019572, doi:[10.1136/bmjopen-2017-019572](https://doi.org/10.1136/bmjopen-2017-019572).
6. Tane, T.; Selak, V.; Hawkins, K.; Lata, V.; Murray, J.; Nicholls, D.; Peihopa, A.; Rice, N.; Harwood, M. Māori and Pacific Peoples' Experiences of a Māori Led Diabetes Programme. *New Zealand Medical Journal* **2021**, *134*, 79–89.

### **Maori Cancer Coordinator**

1. Koia, M. He Pito Ora : Exploring the Role of Māori Cancer Navigators. PhD, Massey University: Wellington, New Zealand, 2019.
2. Ministry of Health *New Zealand Cancer Action Plan 2019-2029*; Ministry of Health: Wellington, 2020;
- 3.

Slater, T.M. The Role and Potential of Community Based Cancer Care for Maori in Aotearoa/New Zealand. PhD, Massey University: Wellington, 2016.

4.

Tanuvasa, A.F.; Neale, J. Evaluation of Pacific Cancer Care Navigation Patient Facilitation and Support Service. *Evaluation Journal of Australasia* **2015**, *15*, 30–36.

### **Pacific Navigator**

1.

Gray, B.; Stubbe, M.; Hilder, J. *Integrating Health Navigation and Interpreting Services for Patients with Limited English Proficiency*; Department of Primary Health Care & General Practice, University of Otago Wellington (ARCH Group): Wellington, 2017;

2.

Tanuvasa, A.F.; Neale, J. Evaluation of Pacific Cancer Care Navigation Patient Facilitation and Support Service. *Evaluation Journal of Australasia* **2015**, *15*, 30–36.

### **Partnership Community Worker**

1.

McCreanor, M.; van Venrooy, M.; Bidwell, S. Collaborating to Improve Equity for the Missing and the Missing out: PCW Partnership Community Worker Service. Presented at the Long Term Conditions Forum, 2020.

2.

Pegasus Health PCW: Partnership Community Worker Success Stories 2022.

3.

Penfold, C. Is the Canterbury Partnership Community Health Worker Project Fulfilling Its Original Intention? Masters of Health Science, University of Canterbury, 2015.

4.

Wilkinson, A.; Atlas, J.; Nelson, K.; Mulligan, H. Client Perceptions of Engaging with a Health and Social Care Navigation Service: A Qualitative Study. *Chronic Illness* **2022**, *18*, 169–180, doi:[10.1177/1742395320937046](https://doi.org/10.1177/1742395320937046).

### **Other Health Navigator**

1.

Doolan-Noble, F.; Smith, D.; Gauld, R.; Waters, D.L.; Cooke, A.; Reriti, H. Evolution of a Health Navigator Model of Care within a Primary Care Setting: A Case Study. *Aust. Health Review* **2013**, *37*, 523, doi:[10.1071/AH12038](https://doi.org/10.1071/AH12038).

### **Case Manager (Private Insurance)**

1.

Currie, V. *Managed Care Education Availability, Suitability and Potential of Courses and Qualifications in Regards to Coordinated Care Workforce Skills: A Review for Health Workforce New Zealand*; p. 90;.

#### **Accident Compensation Corporation (ACC)- Recovery Partner & Recovery Coordinator**

1. Accident Compensation Corporation (ACC) *Next Generation Case Management Post Implementation Review: Internal Audit*; ACC, 2022;
2. Collinson, C.; Flett, R.; Handy, J.; Brook, J.; Alpass, F. Job Satisfaction in Rehabilitation Case Managers: The Role of Organisational Commitment and Climate, Occupational Self Efficacy, and Perceived Competencies. *The Australian Journal of Rehabilitation Counselling* **2000**, 6, 67–77, doi:[10.1017/S1323892200000909](https://doi.org/10.1017/S1323892200000909).
3. Currie, V. *Managed Care Education Availability, Suitability and Potential of Courses and Qualifications in Regards to Coordinated Care Workforce Skills: A Review for Health Workforce New Zealand*; p. 90;.
4. Flett, R.; Collinson, C.; Handy, J.; Alpass, F. Skill Development and Problems in the Achievement of Transfer of Training Effects: Some New Zealand Rehabilitation Case Manager Data. *The Australian Journal of Rehabilitation Counselling* **2002**, 8, 127–132, doi:[10.1017/S1323892200000594](https://doi.org/10.1017/S1323892200000594).

#### **Practice Nurse Case Managers**

1. Aguirre-Duarte, N.; Ovretveit, J.; Kenealy, T. Evaluating Diabetes Care Quality Improvement Strategies Used by Clinical Teams in Five Primary Care Practices in New Zealand. **2021**, 134, 89–98.
2. Carswell, P. Te Whiringa Ora: Person-Centred and Integrated Care in the Eastern Bay of Plenty, New Zealand. *Int J Integr Care* **2015**, 15, doi:[10.5334/ijic.2242](https://doi.org/10.5334/ijic.2242).

Behavioural Support: Health Improvement Practitioner HIP & Health Coach

1. Appleton-Dyer, S.; Andrews, S. *Fit for the Future: An Evaluation Overview for the Enhanced Integrated Practice Teams and Our Health in Mind Strategy (Business Case One)*; Ministry of Health, 2018; p. 7;.
2. Ministry of Health Health Coaches: Practice Profile 2020.

Ministry of Health Integrated Primary Mental Health and Addiction Services : Implementation Toolkit 2020.

3.

Reiter, J.T.; Dobmeyer, A.C.; Hunter, C.L. The Primary Care Behavioral Health (PCBH) Model: An Overview and Operational Definition. *J Clin Psychol Med Settings* **2018**, *25*, 109–126, doi:[10.1007/s10880-017-9531-x](https://doi.org/10.1007/s10880-017-9531-x).

4.

### **Needs Assessment Service Coordinator NASC**

1.

Productivity Commission *Appendix E Case Study Home Based Support for Older People*; More effective social services; NZ Productivity Commission, 2015;

### **Local Area Coordinator**

Productivity Commission *Appendix D Case Study Services for People with Disabilities*; More effective social services; NZ Productivity Commission, 2015;

1.

Roorda, M. *Evaluation of Local Area Coordination*; p. 44;.

2.

New Model People Stories Available online: <https://www.health.govt.nz/your-health/services-and-support/disability-services/other-peoples-stories/new-model-people-stories> (accessed on 3 September 2022).

3.

### **Kaituhuno (Connector)**

EGL National Leadership Group EGL National Leadership Group Guidance on the Kaituhono/Connector Role 2022.

1.

Lovelock, K. *Implementation Evaluation of Mana Whaikaha System Transformation*; Ministry of Health, 2020;

2.

Care Manager Older Adults

Breton, M.; Gray, C.S.; Sheridan, N.; Shaw, J.; Parsons, J.; Wankah, P.; Kenealy, T.; Baker, R.; Belzile, L.; Couturier, Y.; et al. Implementing Community Based Primary Healthcare for Older Adults with Complex Needs in Quebec, Ontario and New-Zealand: Describing Nine Cases. *International Journal of Integrated Care* **2017**, *17*, 12, doi:[10.5334/ijic.2506](https://doi.org/10.5334/ijic.2506).

1.

2. Parsons, J.G.M.; Sheridan, N.; Rouse, P.; Robinson, E.; Connolly, M. A Randomized Controlled Trial to Determine the Effect of a Model of Restorative Home Care on Physical Function and Social Support Among Older People. *Archives of Physical Medicine and Rehabilitation* **2013**, *94*, 1015–1022, doi:[10.1016/j.apmr.2013.02.003](https://doi.org/10.1016/j.apmr.2013.02.003).
3. Parsons, M.; Senior, H.E.J.; Kerse, N.; Chen, M. -h.; Jacobs, S.; Vanderhoorn, S.; Brown, P.M.; Anderson, C. The Assessment of Services Promoting Independence and Recovery in Elders Trial (ASPIRE): A Pre-Planned Meta-Analysis of Three Independent Randomised Controlled Trial Evaluations of Ageing in Place Initiatives in New Zealand. *Age and Ageing* **2012**, *41*, 722–728, doi:[10.1093/ageing/afs113](https://doi.org/10.1093/ageing/afs113).
4. Parsons, M.; Rouse, P.; Sajtos, L.; Harrison, J.; Parsons, J.; Gestro, L. Developing and Utilising a New Funding Model for Home-Care Services in New Zealand. *Health Soc Care Community* **2018**, *26*, 345–355, doi:[10.1111/hsc.12525](https://doi.org/10.1111/hsc.12525).
5. Parsons, M.; Senior, H.; Kerse, N.; Chen, M.; Jacobs, S.; Vanderhoorn, S.; Anderson, C. Should Care Managers for Older Adults Be Located in Primary Care? A Randomized Controlled Trial. *J Am Geriatr Soc* **2012**, *60*, 86–92, doi:[10.1111/j.1532-5415.2011.03763.x](https://doi.org/10.1111/j.1532-5415.2011.03763.x).
6. Parsons, M.; Senior, H.; Kerse, N.; Chen, M.; Jacobs, S.; Anderson, C. Randomised Trial of Restorative Home Care for Frail Older People in New Zealand. *Nursing Older People* **2017**, *29*, 27–33, doi:[10.7748/nop.2017.e897](https://doi.org/10.7748/nop.2017.e897).
7. Williams, L.A.; Moeke-Maxwell, T.; Wiles, J.; Black, S.; Trussardi, G.; Kerse, N.; Gott, M. How Family Caregivers Help Older Relatives Navigate Statutory Services at the End of Life: A Descriptive Qualitative Study. *Palliat Med* **2018**, *32*, 1124–1132, doi:[10.1177/0269216318765853](https://doi.org/10.1177/0269216318765853).
8. Wodchis, W.P.; Dixon, A.; Anderson, G.M.; Goodwin, N. Integrating Care for Older People with Complex Needs: Key Insights and Lessons from a Seven-Country Cross-Case Analysis. *Int J Integr Care* **2015**, *15*, doi:[10.5334/ijic.2249](https://doi.org/10.5334/ijic.2249).

#### Cancer Nurse Coordinator

1. Blakely, T. Cancer Care Coordinators in Stage III Colon Cancer: A Cost-Utility Analysis. **2015**, 12.
2. Collinson, L.; Foster, R.H.; Stapleton, M.; Blakely, T. Cancer Care Coordinators: What Are They and What Will They Cost? **2013**, *126*, 13.
3. Smith, L. *Cancer Nurse Coordinator Initiative Evaluation Final Report*; Ministry of Health, 2016; p. 38;.

#### Midwives

1. Blakely, T. Cancer Care Coordinators in Stage III Colon Cancer: A Cost-Utility Analysis. **2015**, 12.
2. Collinson, L.; Foster, R.H.; Stapleton, M.; Blakely, T. Cancer Care Coordinators: What Are They and What Will They Cost? **2013**, *126*, 13.
3. Smith, L. *Cancer Nurse Coordinator Initiative Evaluation Final Report*; Ministry of Health, 2016; p. 38;.

#### Mental Health Workers

No articles were found
