# Supplementary material for: Demystifying Case Management in Aotearoa New Zealand: A scoping and mapping review
Source: Preprints.org preprint supplement (doi:10.20944/preprints202211.0536.v1), 2022-11-29

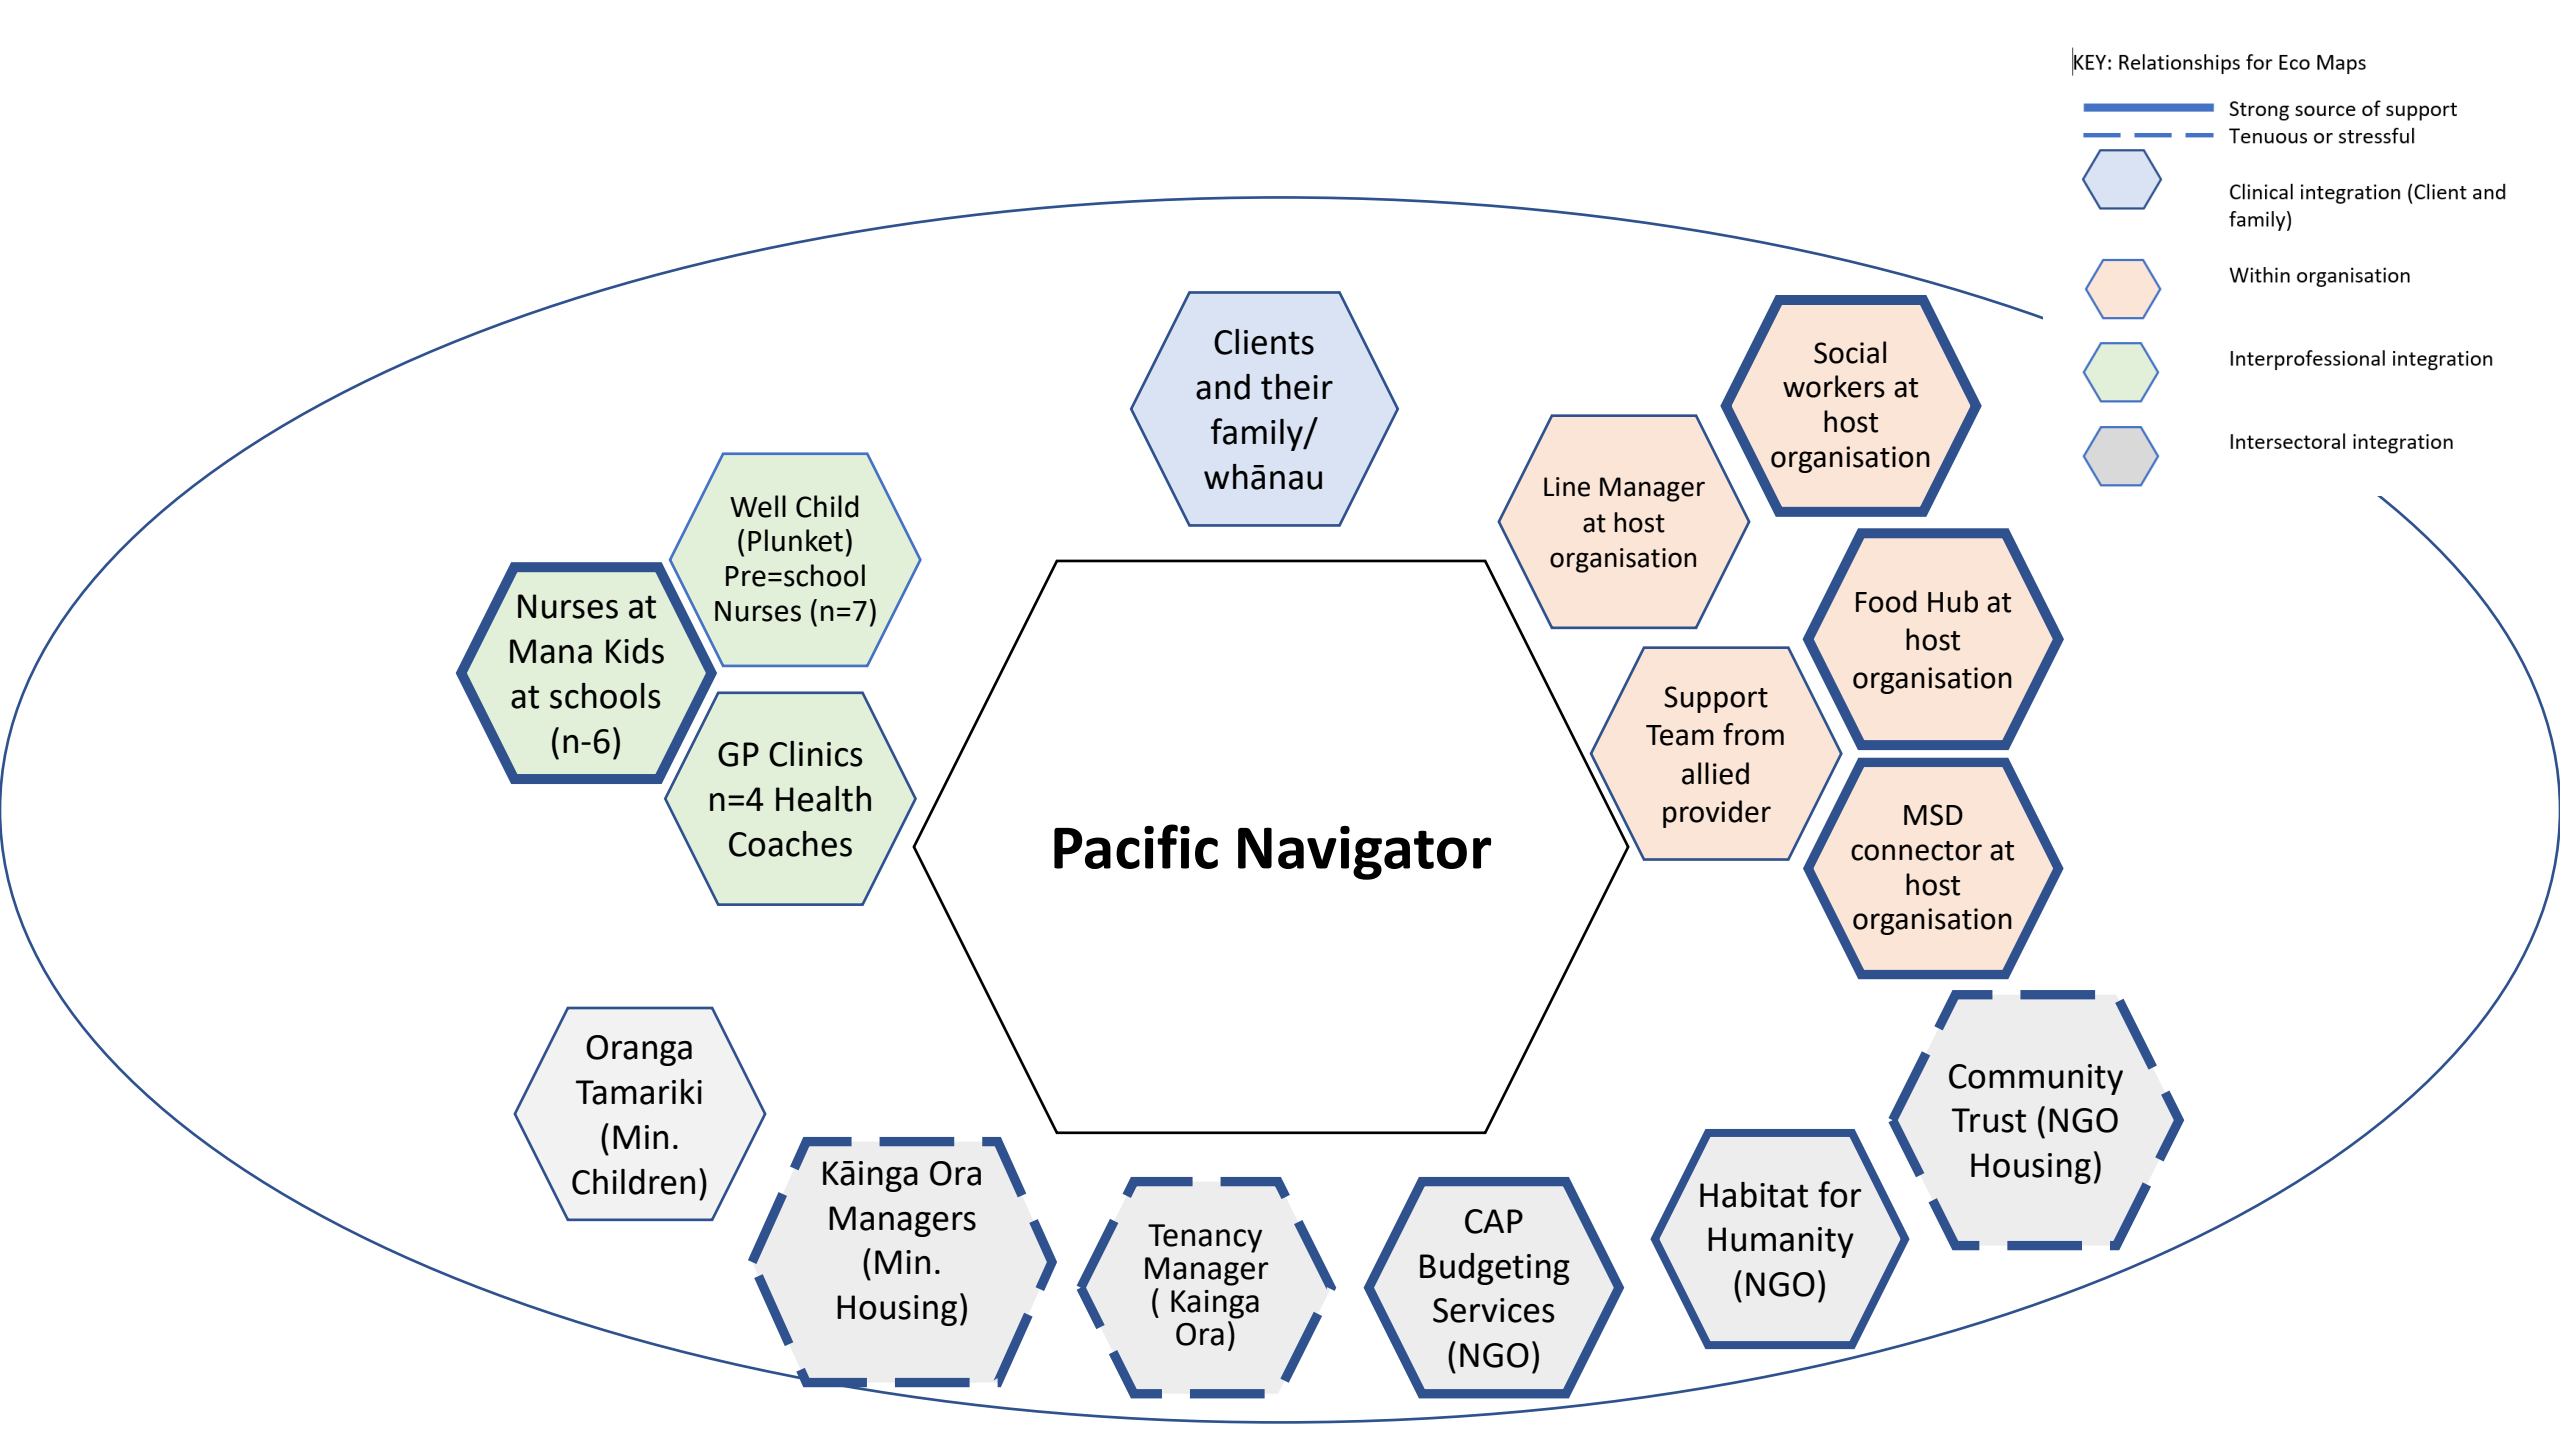

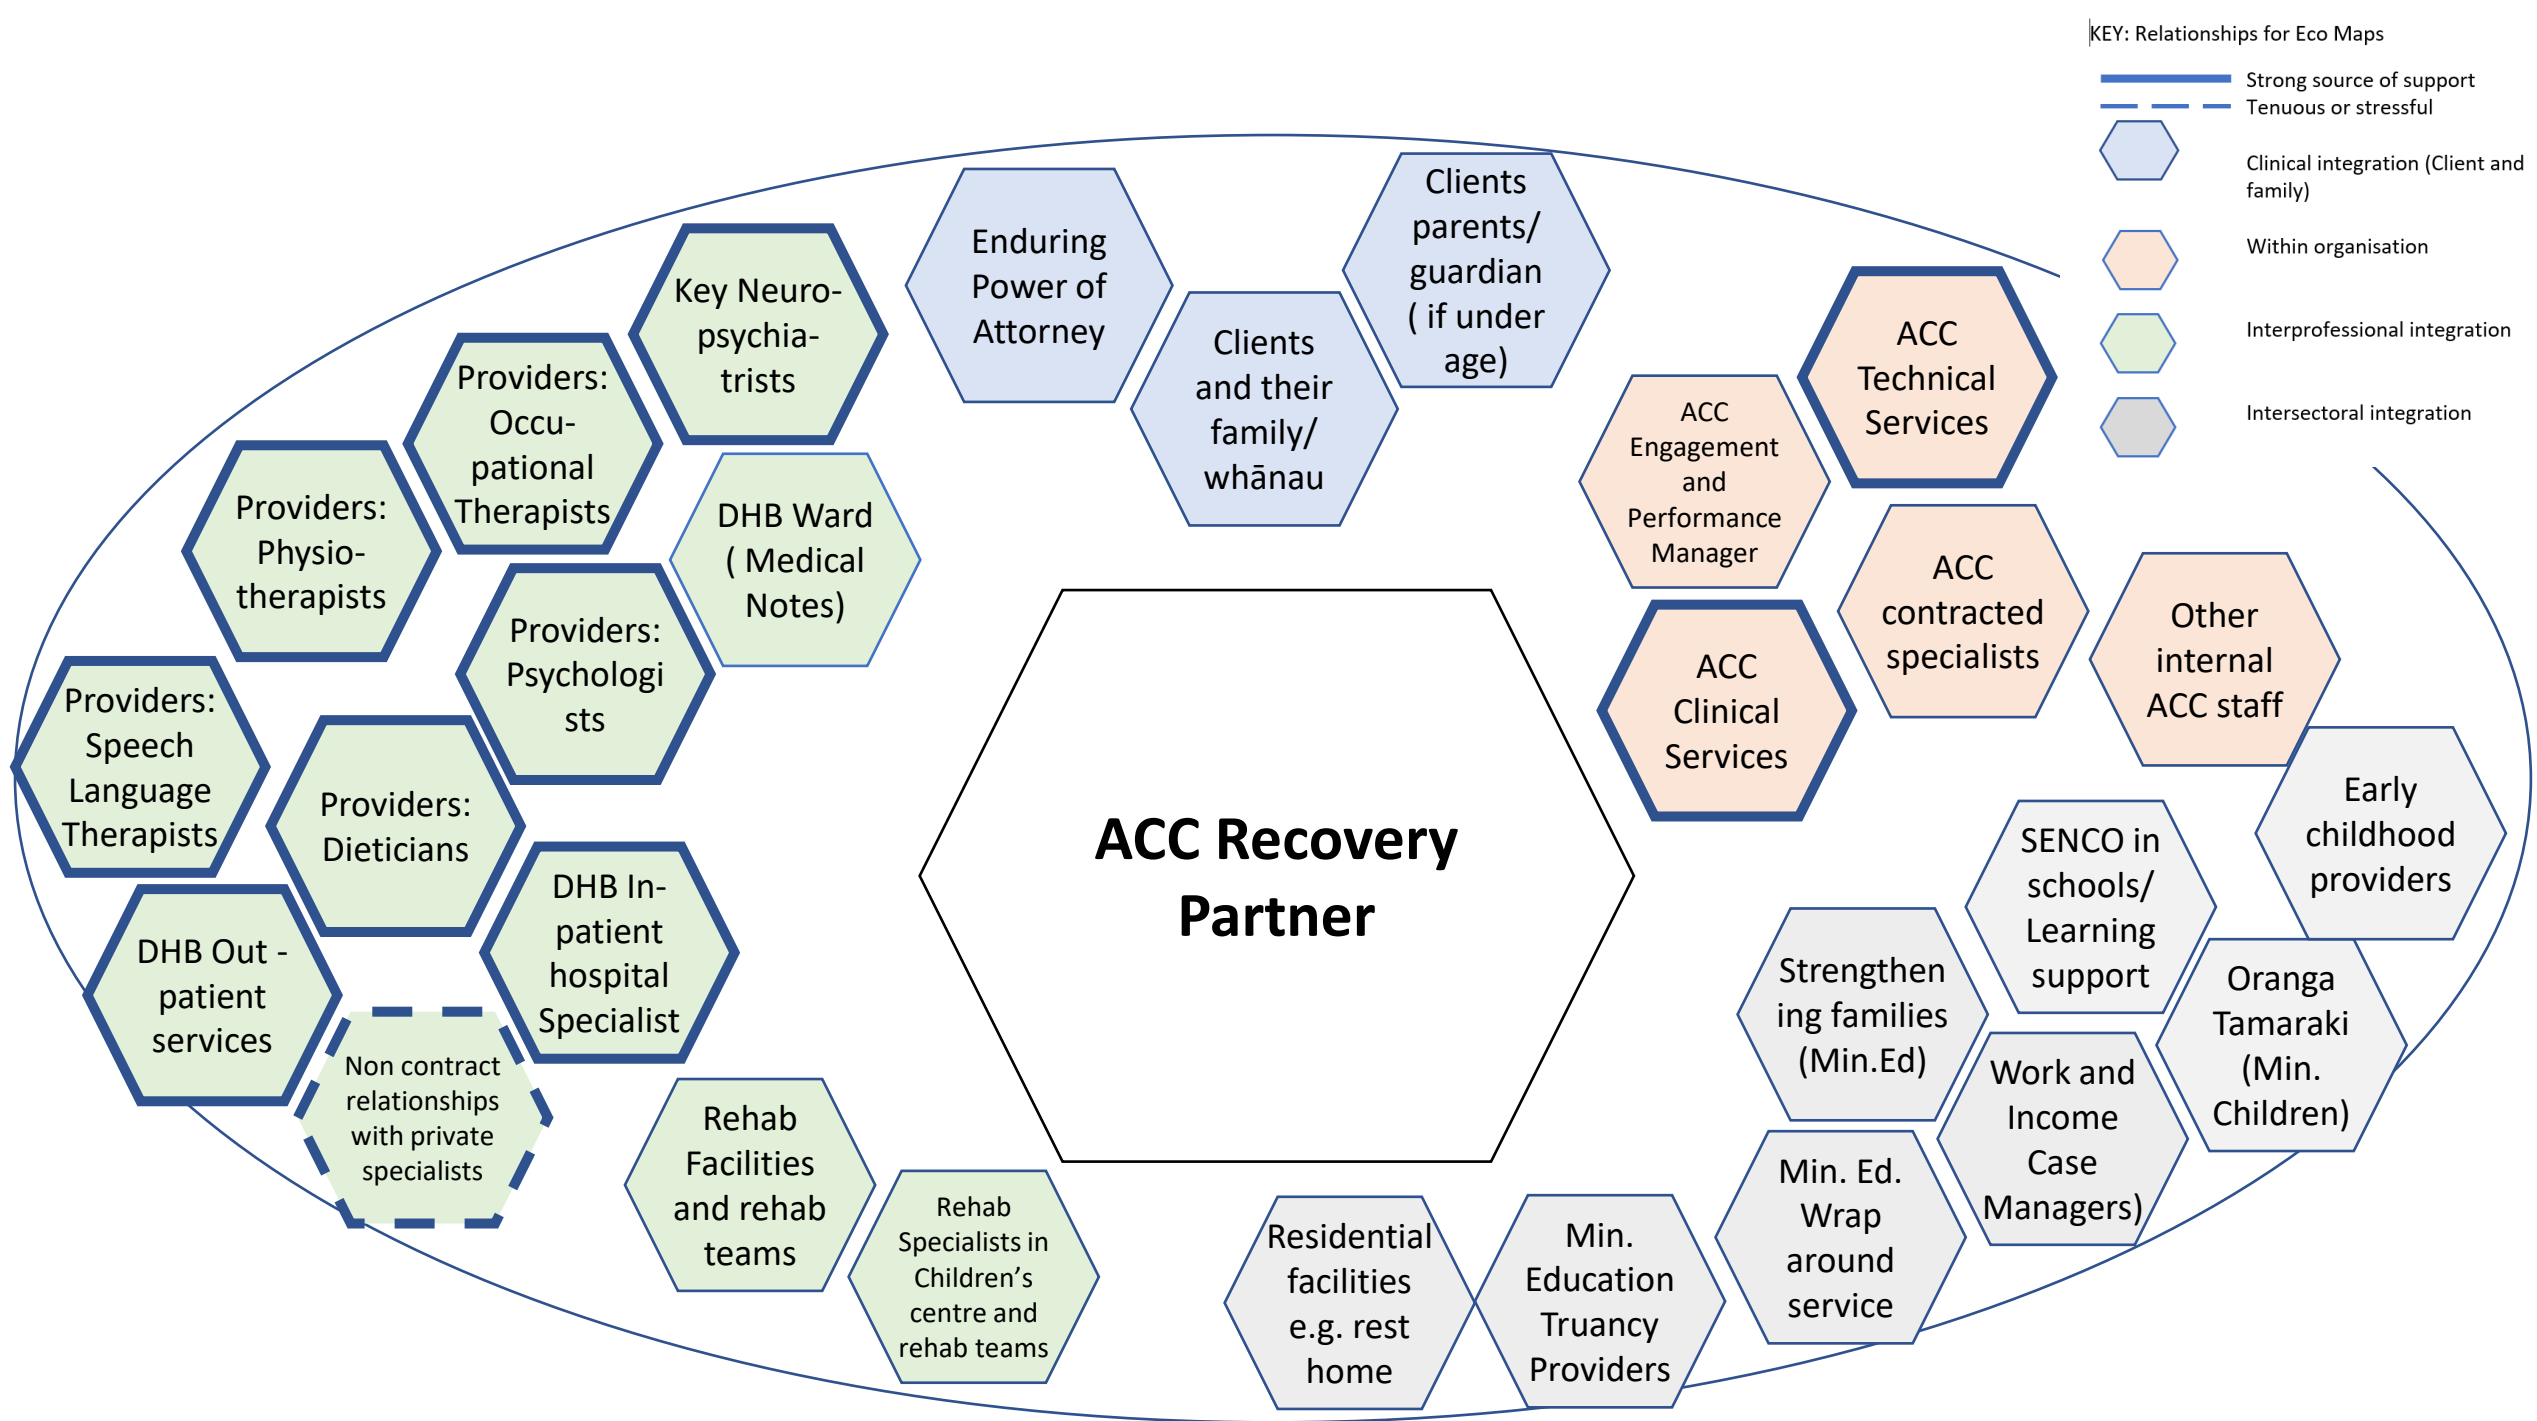

KEY: Relationships for Eco Maps

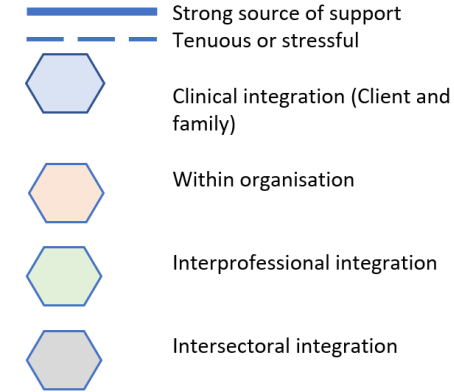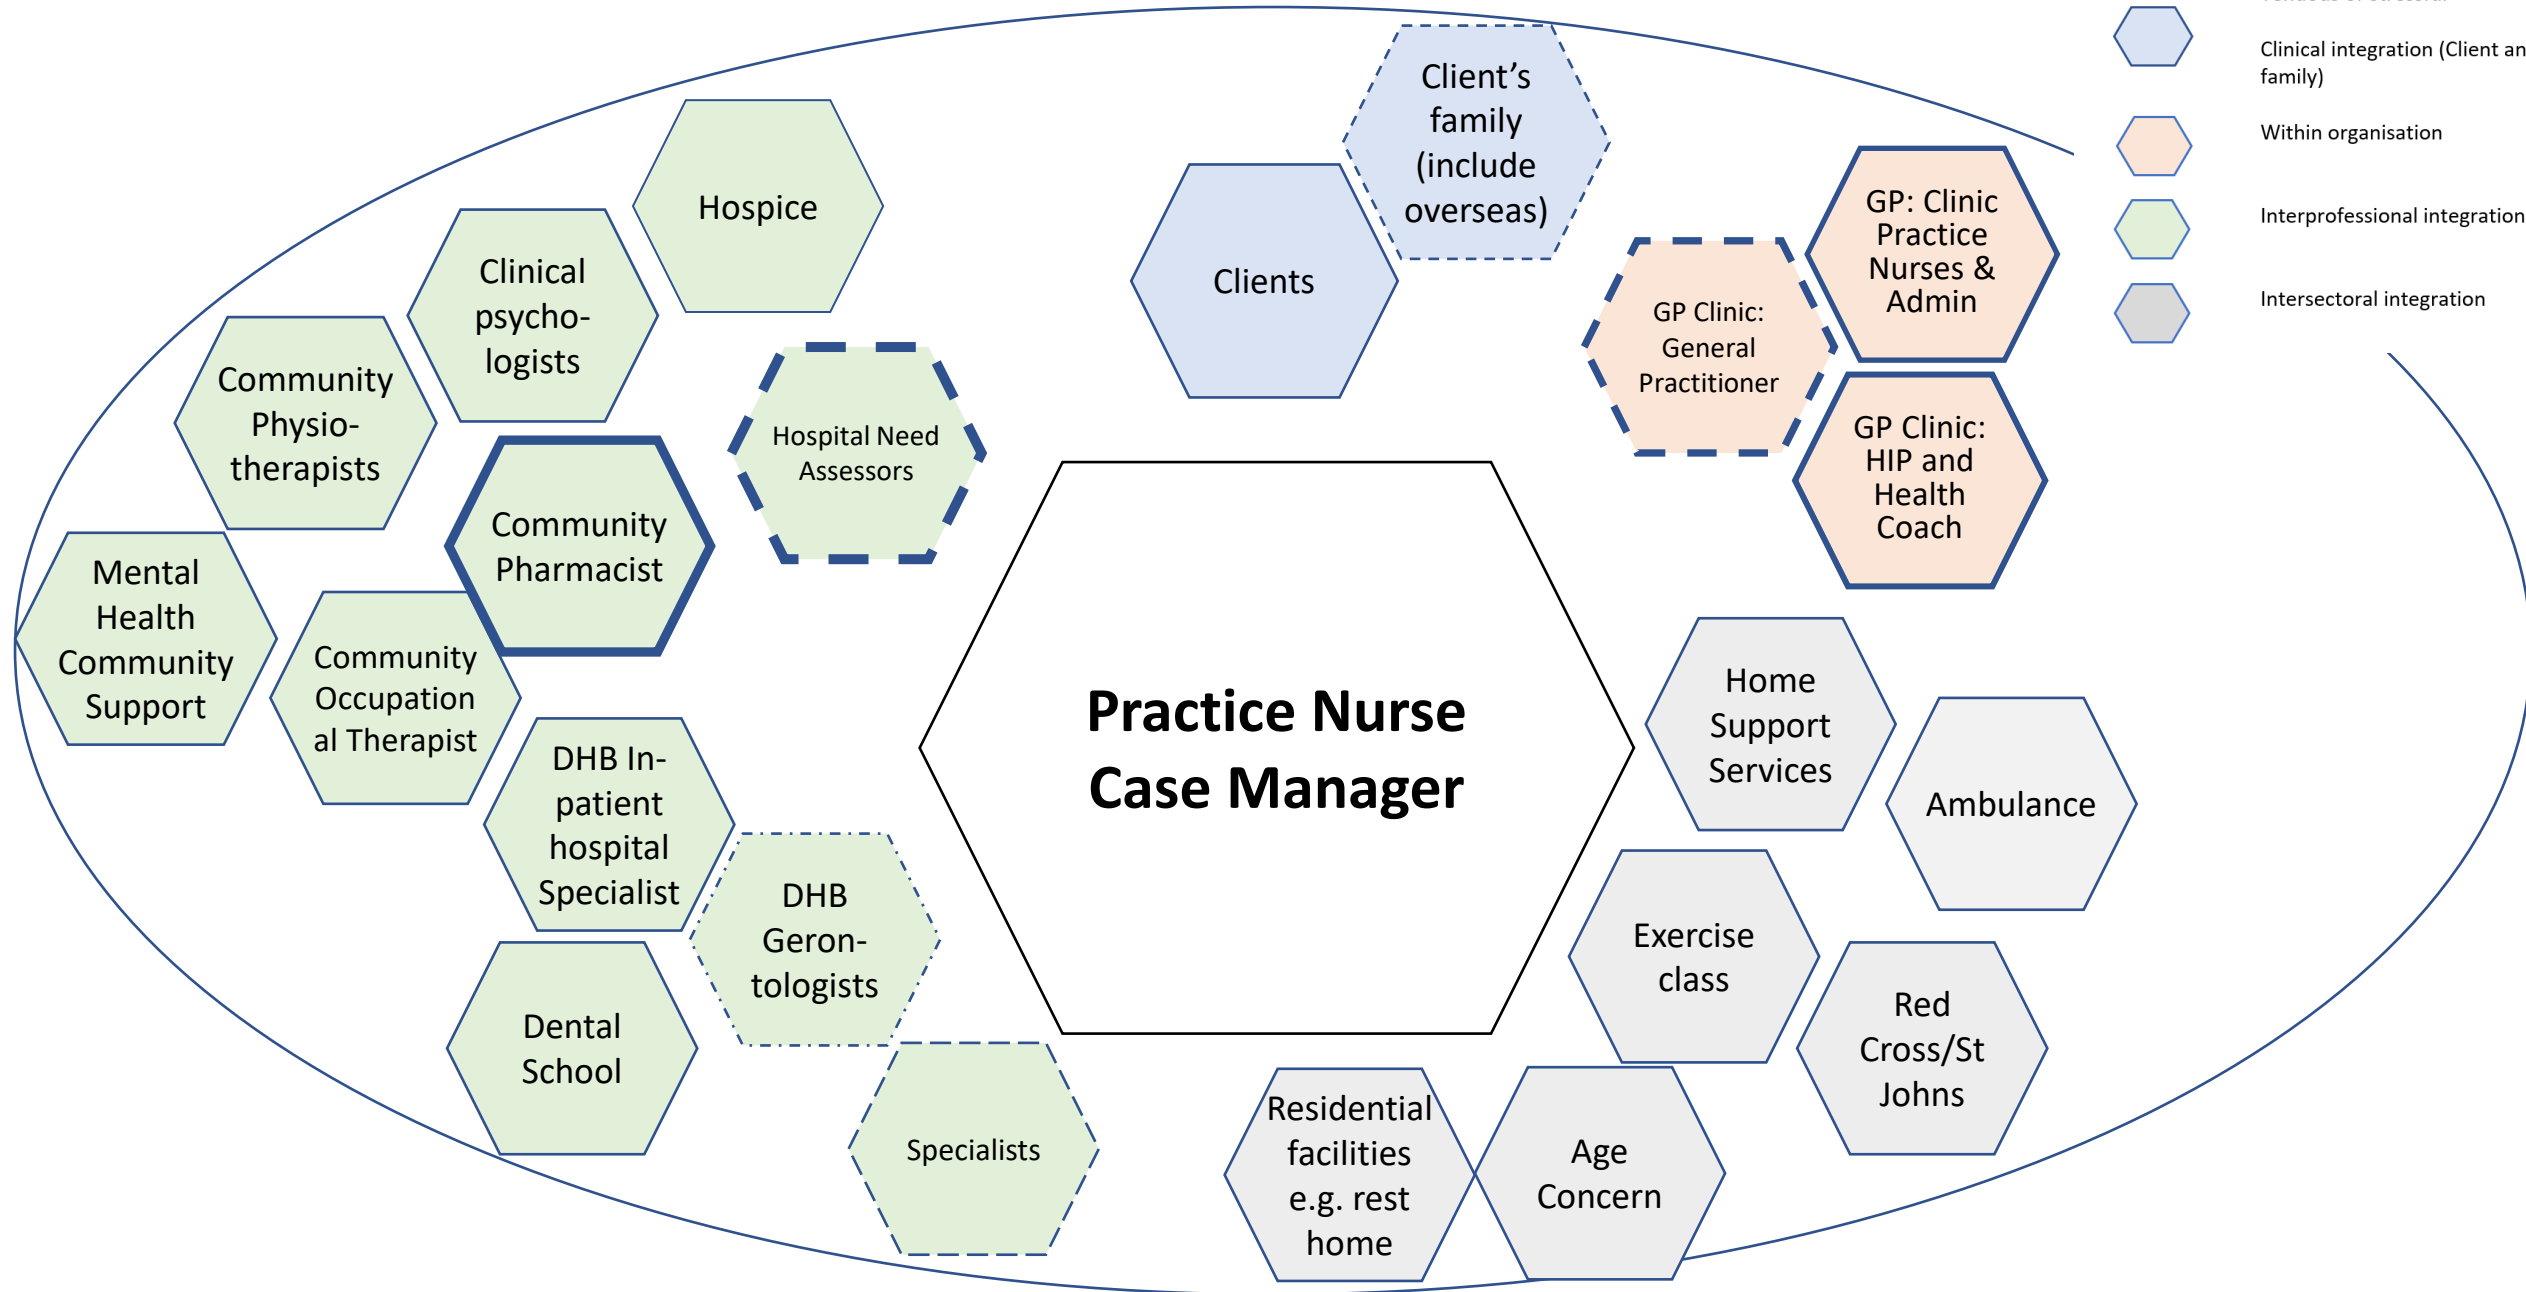

KEY: Relationships for Eco Maps

- Strong source of support
- Tenuous or stressful
- Clinical integration (Client and family)
- Within organisation
- Interprofessional integration
- Intersectoral integration

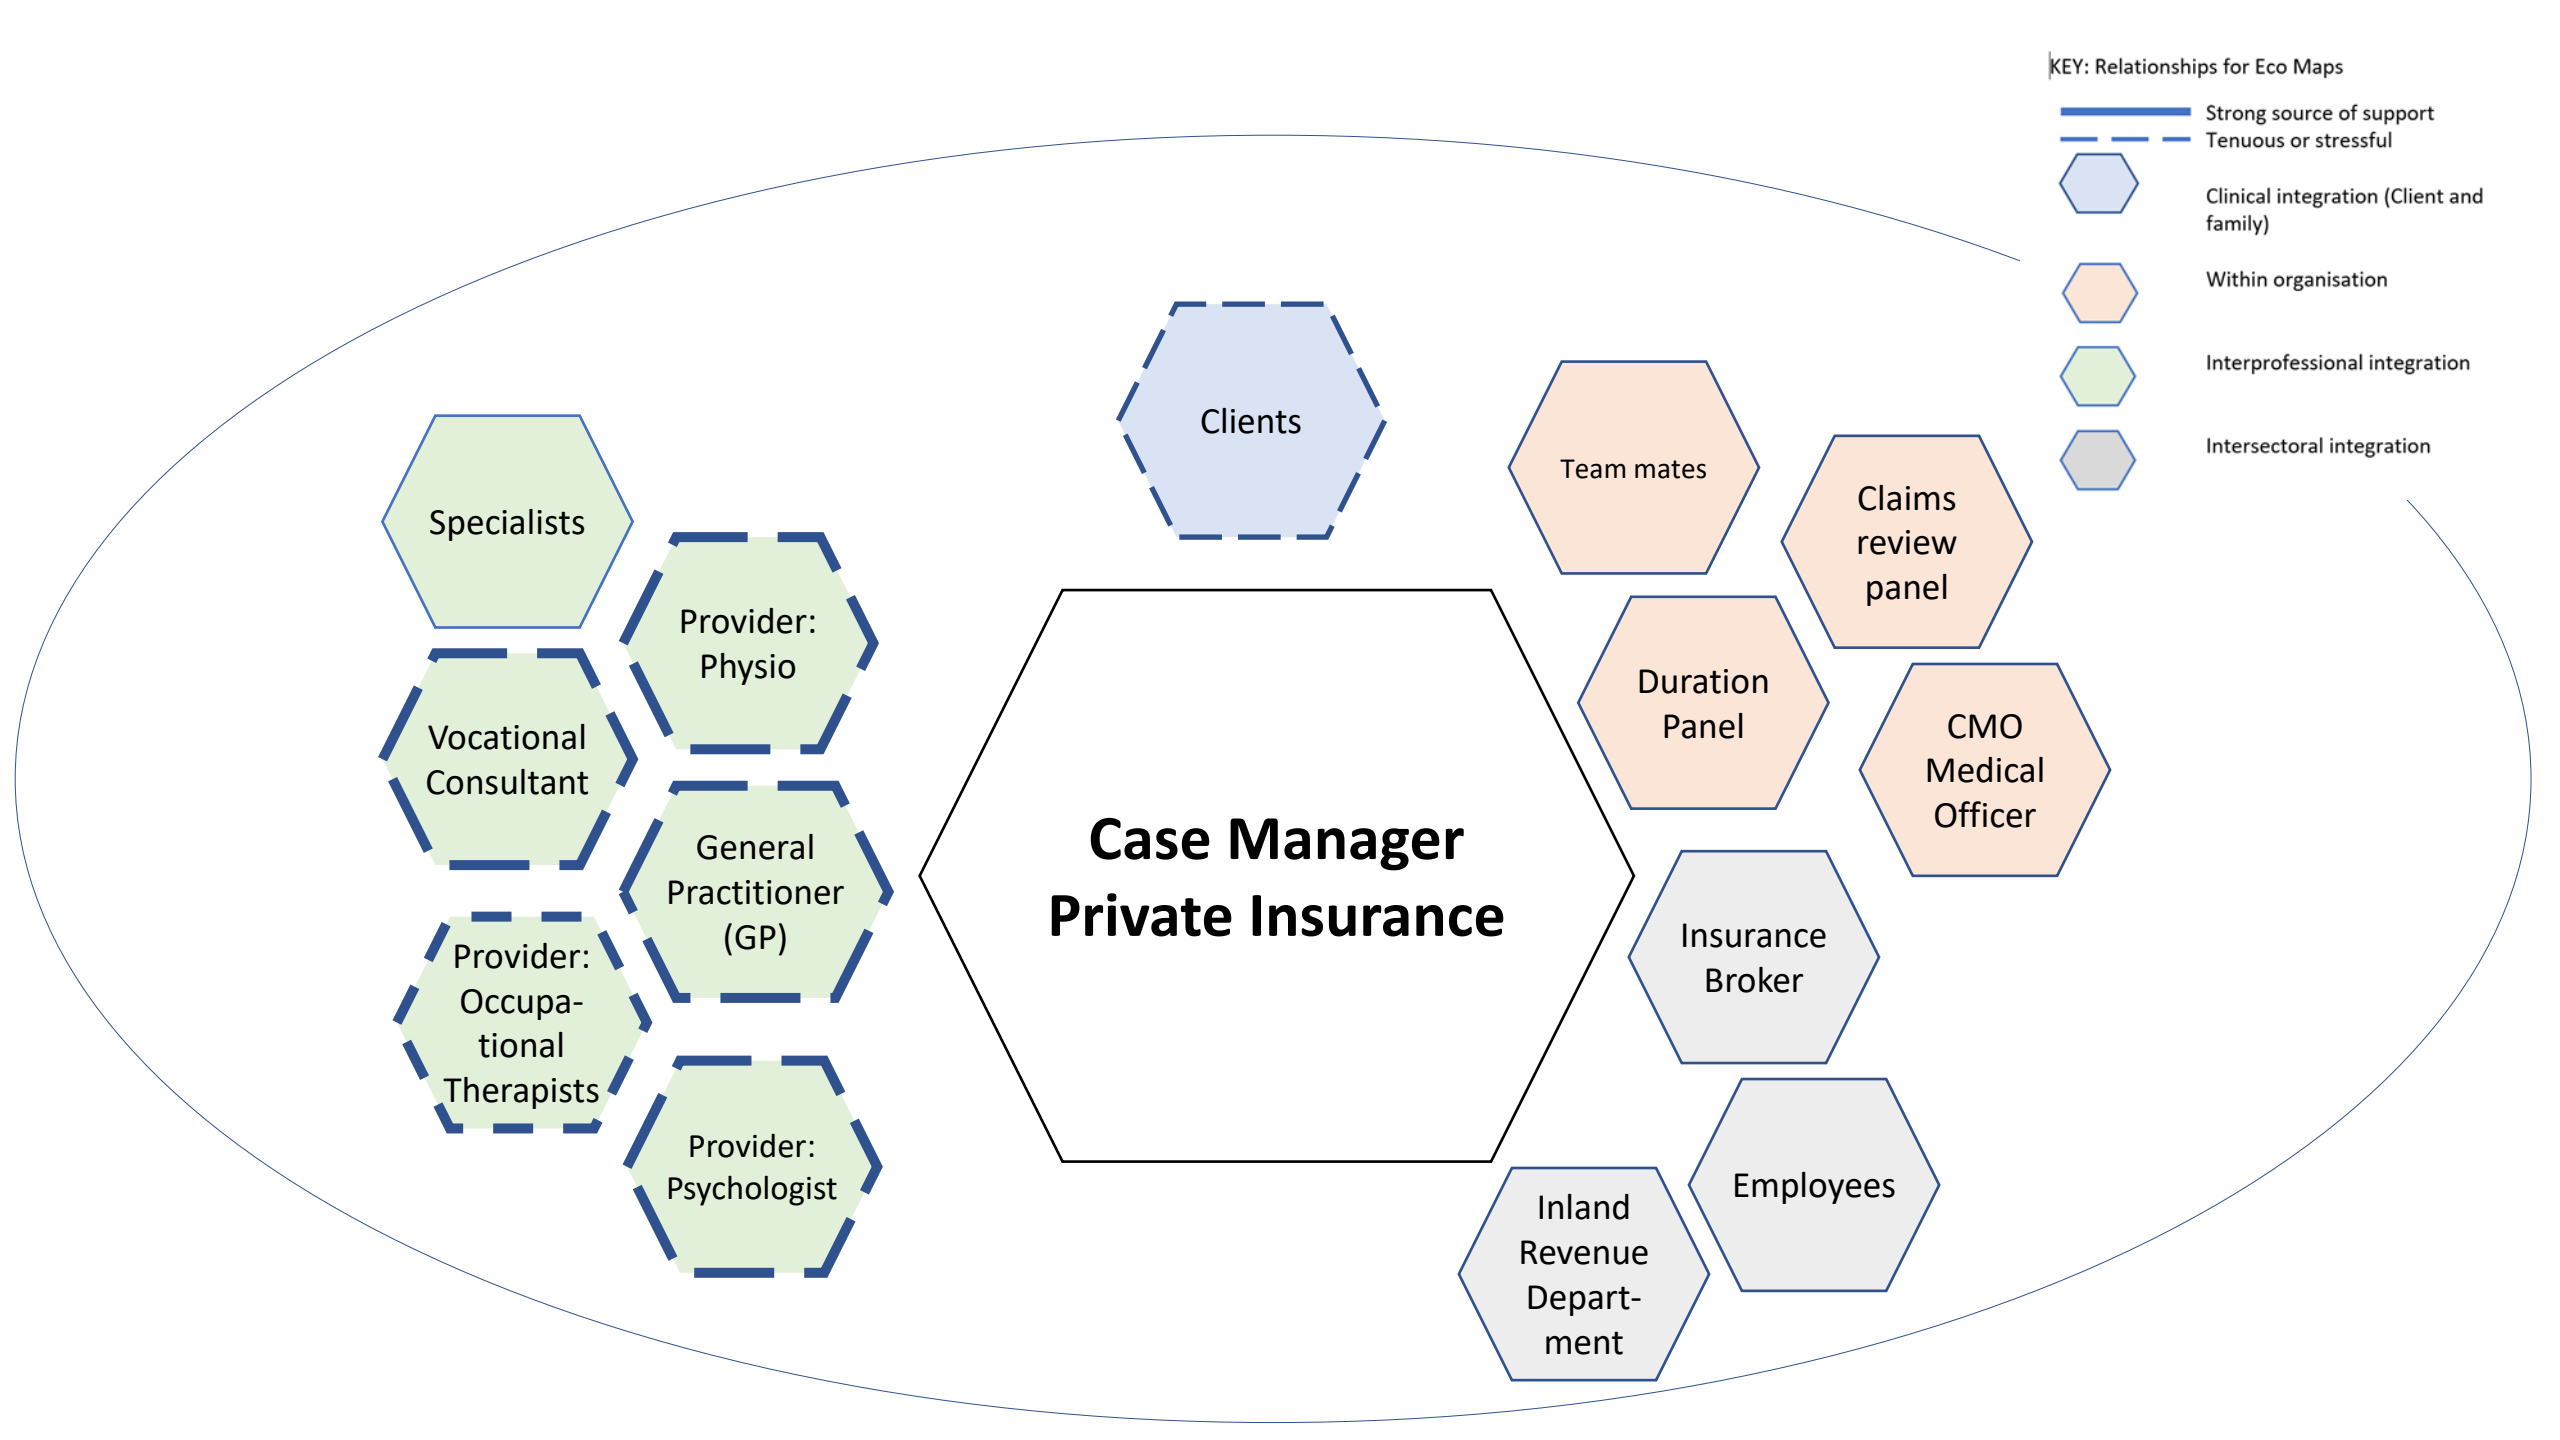

Supplement: Supplementary file 2 [file supplementary › S3 Eco Map Exemplars.pdf]
